# Supplementary material for: Chemistry in Fungal Bioluminescence: Theoretical Studies on Biosynthesis of Luciferin from Caffeic Acid and Regeneration of Caffeic Acid from Oxidized Luciferin
Source: MDPI journal article supplement (doi:10.3390/jof9030369), 2023-03-18
Supplement: s1 [file s1]

## Supporting Information

### Chemistry in Fungal Bioluminescence: Theoretical Studies on Biosynthesis of Luciferin from Caffeic Acid and Regeneration of Caffeic Acid from Oxidized Luciferin

Xiayu Liu<sup>1</sup>, Mingyu Wang<sup>2</sup>, Ya-Jun Liu<sup>1,3,\*</sup>

*1 Key Laboratory of Theoretical and Computational Photochemistry,  
Ministry of Education, College of Chemistry, Beijing Normal University,  
Beijing 100875, China,*

*2 School of Science, Hainan University, Haikou 570228, China*

*3 Center for Advanced Materials Research, Beijing Normal  
University, Zhuhai 519087, China,*

### Table of contents

|                                                                                            |   |
|--------------------------------------------------------------------------------------------|---|
| Detailed Simplified scheme of related molecules in Stage 1 .....                           | 2 |
| References.....                                                                            | 4 |
| The XYZ Cartesian Coordinates of optimized equilibrium structures (unit:<br>Ångstrom)..... | 5 |

## Detailed Simplified scheme of related molecules in Stage 1

During the biosynthesis of hispidin, adenosine triphosphate-magnesium ion complex (Mg-ATP) and CoA are involved in the reaction, which contain many atoms and greatly raised the complexity of calculation. To solve this, we only reserved the key reaction positions in theoretical research, and the rest parts were simplified according to the principle that the  $pK_a$  values of substituted conjugated acids are similar. The most critical reaction site in MgATP is the first phosphate linked to adenosine, while magnesium pyrophosphate ion complex (Mg-PPi) plays the role of leaving group in the reaction. The Mg-PPi tends to exist in the form of  $MgHP_2O_7$ [1]. Because the  $pK_a$  value of  $MgH_2P_2O_7$  ( $pK_{a1}=4.4$ ,  $pK_{a2}=6.6$ ) is similar to that of  $CH_3COOH$  ( $pK_a=4.75$ ), the part of Mg-PPi in Mg-ATP can be simplified to  $CH_3COO$ [2], as shown in Scheme S1. After the leaving of Mg-PPi, the remaining adenosine monophosphate (AMP) still acts as a leaving group and has a large number of atoms, which is not directly related to the reaction process. As the  $pK_a$  values of AMP ( $pK_{a1}=3.8$ ,  $pK_{a2}=6.2$ )[3] and dihydromethyl phosphate ( $pK_{a1}=2.2$ ,  $pK_{a2}=7.9$ )[2] are similar, adenosine can be simplified as methyl. Therefore, as shown in Scheme S2, in the quantum chemistry calculation, acetyl methyl phosphate, a simplified calculation model, is used to simulate the behavior of Mg-ATP in the actual reaction process.

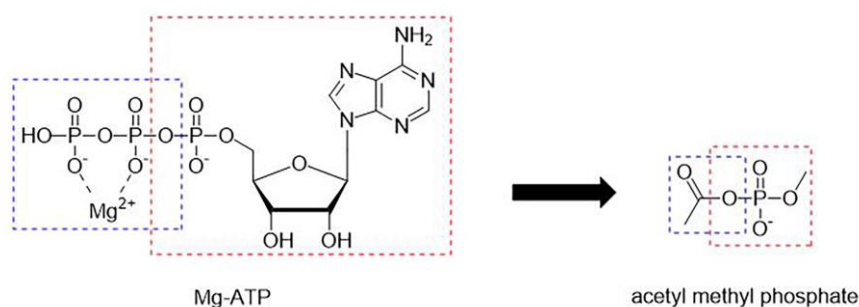

**Scheme S1.** Simplification strategy of the calculation model of MgATP

After CoA and caffeic acid are combined, caffeoyl-CoA achieves the growth of carbon chain through condensation reaction, which involves the process of transferring caffeoyl from CoA to cysteine. This progress is called loading of substrate. Whether CoA or cysteine, it is the sulfhydryl group in the molecule that actually involved in the reaction. The large volume group linked to sulfhydryl group in CoA and cysteine do not actually participate in the reaction process, and the  $pK_a$  values of sulfhydryl group in CoA and cysteine are 9.83 and 10.3, respectively[4, 5, 6, 7], while that of sulfhydryl group in methyl mercaptan is 10.3[3], so large groups in both molecules that link to sulfhydryl groups can be simplified as methyl, that is, CoA and cysteine could be simplified as methyl mercaptan. The  $pK_a$  value of sulfhydryl group has little change before and after the simplification of the model, which indicates that the simplification method is reasonable.

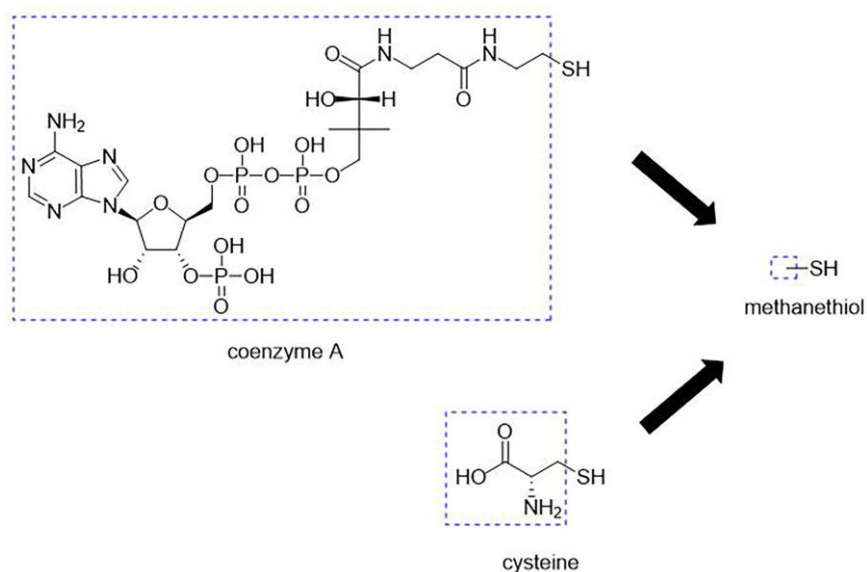

**Scheme S2.** Simplification strategy of the calculation model of CoA and cysteine.

The 3-hydroxylation process of hispidin involves flavin peroxide (FADH-4a-OOH), and the long phosphoribosyl side chain in its molecule is not directly involved in the process. Therefore, as shown in Scheme S3, this part is replaced by methyl in the calculation, that is, FADH-4a-OOH is simplified as peroxide of lumiflavin (LFOOH). The rationality of this simplified way has been confirmed by theoretical simulation of other flavins participating in the reaction,[8] and imidazole cation or neutral imidazole molecule is introduced to simulate the proton donor or proton acceptor near the reaction center. When studying the proton transfer process in substrate molecules assisted by hydrogen bond network in the environment, water molecules were introduced as water bridges.

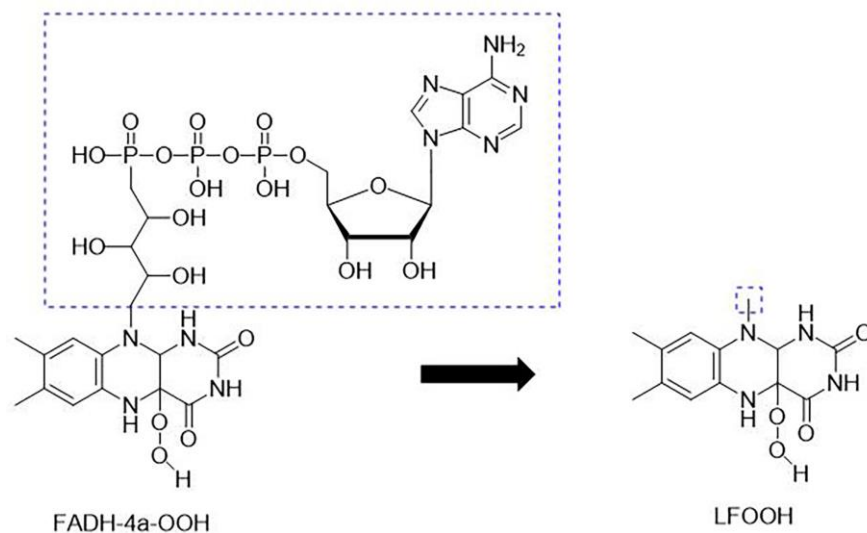

**Scheme S3.** Simplification strategy of the calculation model of flavin peroxide

## References

1. Humberto Saint-Martin LER-V, Alejandro Ramí'ez-Solí's, and Iva'n Ortega-Blake. Toward an Understanding of the Hydrolysis of Mg-PPi. An ab Initio Study of the Isomerization Reactions of Neutral and Anionic Mg-Pyrophosphate Complexes. *J Am Chem Soc.* **1996**, *118*, 12167-12173.
2. Smith P. A.S. Ionization-Constants of Inorganic Acids and Bases in Aqueous-Solution, 2nd Edition - PERRIN,DD. *J Am Chem Soc.* **1984**, *106*, 7298-7298.
3. Greenstein G.R. The Merck Index: An Encyclopedia of Chemicals, Drugs, and Biologicals (14th Edition). *Reference reviews.* **2007**, *21*, 40-40.
4. Gout I. Coenzyme A: a protective thiol in bacterial antioxidant defence. *Biochem Soc Trans.* **2019**, *47*, 469-476.
5. Marques S.M., da Silva JC. An optimized luciferase bioluminescent assay for coenzyme A. *Anal Bioanal Chem.* **2008**, *391*, 2161-2168.
6. David A. Keire E.S., Wei Guo, Béla NoszáV and Dallas L. Rabenstein. Kinetics and Equilibria of Thiol/Disulfide Interchange Reactions of,Selected Biological Thiols and Related Molecules with Oxidized Glutathione. *J Org Chem.* **1992**, *57*, 123-127.
7. David A. Keire J.M.R., and Dallas L. Rabenstein. Microscopic Protonation Equilibria and Solution Conformations of Coenzyme A and Coenzyme A Disulfides. *J. Org. Chem.* **1992**, *57*, 4427-4431.
8. Luo Y.L., Liu Y.J. Theoretical Insight into a Nonadiabatic Proton-Coupled Electron Transfer Mechanism of Reduced Flavin Oxygenation. *J Phys Chem A.* **2019**, *123*, 4354-4359.

## The XYZ Cartesian Coordinates of optimized equilibrium structures (unit: Ångstrom)

R<sub>1.1.1</sub>

|   |              |              |              |
|---|--------------|--------------|--------------|
| C | 3.096036000  | 1.522747000  | 0.254501000  |
| C | 2.115288000  | 2.263276000  | -0.269844000 |
| H | 1.279752000  | 1.812364000  | -0.798830000 |
| C | 2.100482000  | 3.778874000  | -0.194320000 |
| O | 3.057476000  | 4.351089000  | 0.394947000  |
| O | 1.112687000  | 4.337516000  | -0.743953000 |
| H | 3.900480000  | 2.063685000  | 0.749552000  |
| C | 3.239104000  | 0.059068000  | 0.210212000  |
| C | 4.452642000  | -0.509079000 | 0.611447000  |
| C | 2.216624000  | -0.794822000 | -0.231189000 |
| C | 4.655886000  | -1.886682000 | 0.559538000  |
| H | 5.251930000  | 0.135063000  | 0.964501000  |
| C | 2.415468000  | -2.162998000 | -0.290035000 |
| H | 1.245606000  | -0.411229000 | -0.523027000 |
| C | 3.641211000  | -2.711768000 | 0.105094000  |
| H | 5.604878000  | -2.315984000 | 0.870122000  |
| P | -2.664702000 | 0.093750000  | -0.448426000 |
| O | -1.950327000 | -1.181694000 | -0.752918000 |
| O | -3.803852000 | -0.237576000 | 0.797570000  |
| O | -1.690361000 | 1.019309000  | 0.451224000  |
| O | -3.396988000 | 0.894657000  | -1.481331000 |
| C | -2.028579000 | 2.383788000  | 0.713755000  |
| H | -2.991881000 | 2.451825000  | 1.228411000  |
| H | -1.239587000 | 2.782972000  | 1.353544000  |
| H | -2.059200000 | 2.957144000  | -0.215293000 |
| C | -4.882370000 | -1.018078000 | 0.698304000  |
| O | -5.628887000 | -1.125439000 | 1.655878000  |
| C | -5.119823000 | -1.739224000 | -0.601106000 |
| H | -5.198460000 | -1.018145000 | -1.418484000 |
| H | -4.267519000 | -2.384911000 | -0.824024000 |
| H | -6.033188000 | -2.326689000 | -0.522121000 |
| O | 3.734302000  | -4.080988000 | 0.008762000  |
| H | 4.587527000  | -4.390031000 | 0.335946000  |
| O | 1.412292000  | -2.974229000 | -0.729909000 |
| H | 1.707626000  | -3.894068000 | -0.674234000 |

TS<sub>1.1.1</sub>

|   |             |             |              |
|---|-------------|-------------|--------------|
| C | 1.926949000 | 1.763886000 | -0.209797000 |
|---|-------------|-------------|--------------|

|   |              |              |              |
|---|--------------|--------------|--------------|
| C | 0.628652000  | 1.515844000  | -0.408367000 |
| H | 0.235185000  | 0.513580000  | -0.529690000 |
| C | -0.386586000 | 2.624900000  | -0.454762000 |
| O | 0.004493000  | 3.807385000  | -0.536148000 |
| O | -1.625623000 | 2.296238000  | -0.398613000 |
| H | 2.224089000  | 2.804790000  | -0.097984000 |
| C | 3.014433000  | 0.778023000  | -0.110000000 |
| C | 4.307244000  | 1.224944000  | 0.181078000  |
| C | 2.811084000  | -0.599197000 | -0.288907000 |
| C | 5.370782000  | 0.331822000  | 0.297637000  |
| H | 4.485509000  | 2.286225000  | 0.322237000  |
| C | 3.863200000  | -1.489260000 | -0.174058000 |
| H | 1.827649000  | -0.994427000 | -0.516592000 |
| C | 5.149296000  | -1.023263000 | 0.122018000  |
| H | 6.370680000  | 0.691262000  | 0.526068000  |
| P | -2.542066000 | 0.435123000  | -0.125459000 |
| O | -1.826338000 | -0.221360000 | -1.260074000 |
| O | -3.403896000 | -1.393118000 | 0.575690000  |
| O | -1.720515000 | 0.326302000  | 1.267514000  |
| O | -3.867964000 | 1.120077000  | -0.086916000 |
| C | -2.356415000 | 0.745197000  | 2.467407000  |
| H | -3.267001000 | 0.165503000  | 2.636728000  |
| H | -1.645642000 | 0.562764000  | 3.276026000  |
| H | -2.598071000 | 1.811324000  | 2.426234000  |
| C | -4.250397000 | -2.139094000 | -0.027177000 |
| O | -4.771761000 | -3.148861000 | 0.496289000  |
| C | -4.626283000 | -1.771392000 | -1.453934000 |
| H | -5.040263000 | -0.760145000 | -1.470678000 |
| H | -3.724779000 | -1.749752000 | -2.070736000 |
| H | -5.348450000 | -2.483171000 | -1.856376000 |
| O | 6.120312000  | -1.992505000 | 0.213583000  |
| H | 6.971014000  | -1.605635000 | 0.453115000  |
| O | 3.647076000  | -2.825174000 | -0.351478000 |
| H | 4.483052000  | -3.295497000 | -0.222075000 |

P<sub>1.1.1</sub>

|   |              |              |              |
|---|--------------|--------------|--------------|
| C | -2.206308000 | -0.772330000 | 1.317192000  |
| C | -1.191133000 | -1.276137000 | 0.604251000  |
| H | -1.086314000 | -1.129832000 | -0.463278000 |
| C | -0.152235000 | -2.087515000 | 1.280459000  |
| O | -0.240251000 | -2.451668000 | 2.442417000  |
| O | 0.935633000  | -2.438815000 | 0.579634000  |
| H | -2.219789000 | -0.984828000 | 2.383758000  |
| C | -3.314476000 | 0.048808000  | 0.821115000  |

|   |              |              |              |
|---|--------------|--------------|--------------|
| C | -4.263517000 | 0.513986000  | 1.736156000  |
| C | -3.461099000 | 0.387901000  | -0.533256000 |
| C | -5.335087000 | 1.300153000  | 1.320634000  |
| H | -4.163137000 | 0.261917000  | 2.786829000  |
| C | -4.523736000 | 1.166765000  | -0.949982000 |
| H | -2.747257000 | 0.053537000  | -1.277825000 |
| C | -5.465028000 | 1.625824000  | -0.018817000 |
| H | -6.067214000 | 1.658992000  | 2.038432000  |
| P | 1.413016000  | -2.005483000 | -1.004397000 |
| O | 0.263941000  | -2.242838000 | -1.931898000 |
| O | 5.555008000  | 2.766272000  | 0.502787000  |
| O | 1.556703000  | -0.394773000 | -0.825984000 |
| O | 2.744394000  | -2.666218000 | -1.147806000 |
| C | 2.620737000  | 0.146461000  | -0.035775000 |
| H | 3.586869000  | -0.243581000 | -0.360719000 |
| H | 2.601258000  | 1.227840000  | -0.169944000 |
| H | 2.471299000  | -0.091770000 | 1.021684000  |
| C | 6.744985000  | 2.392299000  | 0.317677000  |
| O | 7.783816000  | 3.077752000  | 0.523522000  |
| C | 6.933569000  | 0.969559000  | -0.230515000 |
| H | 6.343450000  | 0.257564000  | 0.354941000  |
| H | 6.556493000  | 0.926913000  | -1.257815000 |
| H | 7.983214000  | 0.669109000  | -0.225078000 |
| O | -6.476051000 | 2.389748000  | -0.540204000 |
| H | -7.069877000 | 2.702407000  | 0.153405000  |
| O | -4.656183000 | 1.489594000  | -2.267111000 |
| H | -5.440351000 | 2.046889000  | -2.376116000 |

R<sub>1,1,2</sub>

|   |              |              |              |
|---|--------------|--------------|--------------|
| C | -5.028259000 | -0.846475000 | 1.232521000  |
| H | -4.278833000 | -0.634323000 | 1.986329000  |
| C | -6.202708000 | -1.481079000 | 1.613179000  |
| H | -6.376815000 | -1.764447000 | 2.645461000  |
| C | -7.180638000 | -1.766352000 | 0.668375000  |
| O | -8.329055000 | -2.388178000 | 1.044284000  |
| H | -8.888610000 | -2.514091000 | 0.263308000  |
| C | -6.973691000 | -1.409085000 | -0.667167000 |
| O | -7.996872000 | -1.731564000 | -1.520310000 |
| H | -7.787758000 | -1.484500000 | -2.429666000 |
| C | -5.804017000 | -0.775686000 | -1.046549000 |
| H | -5.656172000 | -0.502593000 | -2.088091000 |
| C | -4.808336000 | -0.483812000 | -0.102015000 |
| C | -3.592275000 | 0.185815000  | -0.564542000 |
| H | -3.556858000 | 0.424385000  | -1.625700000 |

|   |              |              |              |
|---|--------------|--------------|--------------|
| C | -2.522912000 | 0.534115000  | 0.163436000  |
| H | -2.439507000 | 0.345033000  | 1.227259000  |
| C | -1.376151000 | 1.206847000  | -0.478390000 |
| O | -1.301738000 | 1.489496000  | -1.656169000 |
| S | 8.034546000  | -3.118271000 | -0.260967000 |
| C | 9.173031000  | -1.763968000 | -0.758685000 |
| H | 8.682936000  | -0.786805000 | -0.687993000 |
| H | 10.058482000 | -1.738119000 | -0.117366000 |
| H | 9.510091000  | -1.891718000 | -1.790992000 |
| O | -0.414815000 | 1.482879000  | 0.429547000  |
| P | 1.129440000  | 2.076714000  | 0.091110000  |
| O | 1.751189000  | 2.238111000  | 1.440610000  |
| O | 1.767491000  | 1.195909000  | -0.951743000 |
| O | 0.811827000  | 3.498810000  | -0.603722000 |
| C | 0.278172000  | 4.565633000  | 0.182941000  |
| H | -0.744889000 | 4.337705000  | 0.498228000  |
| H | 0.899728000  | 4.746200000  | 1.062848000  |
| H | 0.269735000  | 5.449527000  | -0.455081000 |
| H | 6.500495000  | -1.953719000 | 0.117492000  |
| N | 5.690214000  | -1.249478000 | 0.302611000  |
| C | 4.755455000  | -0.908378000 | -0.577298000 |
| H | 4.683477000  | -1.282500000 | -1.586352000 |
| N | 3.925283000  | -0.034546000 | -0.012922000 |
| H | 3.078213000  | 0.422428000  | -0.452348000 |
| C | 4.340454000  | 0.194631000  | 1.277330000  |
| H | 3.799166000  | 0.877513000  | 1.914108000  |
| C | 5.451144000  | -0.570979000 | 1.473841000  |
| H | 6.084489000  | -0.691232000 | 2.337729000  |

TS1<sub>1.1.2</sub>

|   |             |              |              |
|---|-------------|--------------|--------------|
| C | 3.712865000 | -0.291374000 | -1.137687000 |
| H | 3.063356000 | -0.307322000 | -2.005552000 |
| C | 5.088139000 | -0.209882000 | -1.325433000 |
| H | 5.512537000 | -0.151472000 | -2.322193000 |
| C | 5.945450000 | -0.212568000 | -0.234127000 |
| O | 7.296331000 | -0.134030000 | -0.420130000 |
| H | 7.728781000 | -0.149974000 | 0.446139000  |
| C | 5.411437000 | -0.304667000 | 1.052142000  |
| O | 6.333532000 | -0.307258000 | 2.070858000  |
| H | 5.898173000 | -0.355652000 | 2.930862000  |
| C | 4.041958000 | -0.387471000 | 1.240109000  |
| H | 3.645018000 | -0.456975000 | 2.249921000  |
| C | 3.162401000 | -0.372467000 | 0.147678000  |
| C | 1.717324000 | -0.443172000 | 0.403548000  |



|   |              |              |              |
|---|--------------|--------------|--------------|
| H | 1.418209000  | -0.731001000 | 1.408926000  |
| C | 0.741496000  | -0.169994000 | -0.469336000 |
| H | 0.934258000  | 0.151718000  | -1.486135000 |
| C | -0.690635000 | -0.295612000 | -0.090085000 |
| O | -1.076152000 | -0.614782000 | 1.031156000  |
| O | -1.481851000 | 0.657261000  | -0.858268000 |
| P | -1.981505000 | 2.079507000  | -0.293935000 |
| O | -2.503654000 | 2.887692000  | -1.429409000 |
| O | -2.924810000 | 1.854173000  | 0.931287000  |
| O | -0.717046000 | 2.761158000  | 0.437541000  |
| C | 0.261655000  | 3.447330000  | -0.349797000 |
| H | 0.841117000  | 2.738735000  | -0.947511000 |
| H | -0.216153000 | 4.179373000  | -1.004228000 |
| H | 0.924734000  | 3.951396000  | 0.353167000  |
| S | -1.109891000 | -2.085412000 | -1.557054000 |
| C | -0.466121000 | -3.319625000 | -0.386644000 |
| H | 0.620789000  | -3.419886000 | -0.461588000 |
| H | -0.717228000 | -3.006672000 | 0.632664000  |
| H | -0.916018000 | -4.298293000 | -0.572639000 |
| N | -4.581418000 | -0.100684000 | 0.783920000  |
| H | -3.603473000 | 1.049831000  | 0.879864000  |
| C | -5.894366000 | -0.224452000 | 1.178068000  |
| H | -6.410421000 | 0.571460000  | 1.693389000  |
| C | -6.363038000 | -1.452982000 | 0.812766000  |
| H | -7.322812000 | -1.927569000 | 0.938346000  |
| N | -5.306920000 | -2.075000000 | 0.185079000  |
| H | -5.308205000 | -2.999667000 | -0.219426000 |
| C | -4.254099000 | -1.230133000 | 0.187976000  |
| H | -3.291061000 | -1.465564000 | -0.254470000 |

IM<sub>1,1,2</sub>

|   |             |              |              |
|---|-------------|--------------|--------------|
| C | 3.715747000 | -0.251995000 | -1.133958000 |
| H | 3.125426000 | -0.205370000 | -2.042402000 |
| C | 5.095891000 | -0.101693000 | -1.217503000 |
| H | 5.581862000 | 0.069508000  | -2.172421000 |
| C | 5.878821000 | -0.176280000 | -0.074003000 |
| O | 7.234806000 | -0.030086000 | -0.156472000 |
| H | 7.607347000 | -0.102644000 | 0.734406000  |
| C | 5.265561000 | -0.409607000 | 1.157543000  |
| O | 6.117592000 | -0.474859000 | 2.233756000  |
| H | 5.626803000 | -0.594853000 | 3.055998000  |
| C | 3.891383000 | -0.562157000 | 1.240686000  |
| H | 3.430888000 | -0.741506000 | 2.209229000  |
| C | 3.085863000 | -0.477307000 | 0.096204000  |

|   |              |              |              |
|---|--------------|--------------|--------------|
| C | 1.630445000  | -0.632939000 | 0.246531000  |
| H | 1.281762000  | -1.014617000 | 1.203935000  |
| C | 0.693274000  | -0.322757000 | -0.650493000 |
| H | 0.931899000  | 0.086215000  | -1.627639000 |
| C | -0.770076000 | -0.576090000 | -0.382002000 |
| O | -1.143408000 | -0.909684000 | 0.770723000  |
| O | -1.495664000 | 0.673898000  | -0.996722000 |
| P | -1.766566000 | 2.070925000  | -0.300746000 |
| O | -2.233951000 | 3.067446000  | -1.309843000 |
| O | -2.684933000 | 1.886098000  | 0.963833000  |
| O | -0.407562000 | 2.548471000  | 0.436492000  |
| C | 0.596822000  | 3.215976000  | -0.327781000 |
| H | 1.070107000  | 2.527311000  | -1.033288000 |
| H | 0.169089000  | 4.061725000  | -0.871245000 |
| H | 1.345172000  | 3.569690000  | 0.382045000  |
| S | -1.340188000 | -1.810884000 | -1.802583000 |
| C | -0.733534000 | -3.328471000 | -1.016930000 |
| H | 0.358107000  | -3.382581000 | -1.033628000 |
| H | -1.076363000 | -3.361761000 | 0.019573000  |
| H | -1.138971000 | -4.184397000 | -1.560492000 |
| N | -4.572935000 | 0.087847000  | 0.932206000  |
| H | -3.448223000 | 1.195167000  | 0.913425000  |
| C | -5.949049000 | 0.071565000  | 0.942633000  |
| H | -6.528832000 | 0.981238000  | 0.987207000  |
| C | -6.389312000 | -1.219275000 | 0.883977000  |
| H | -7.379082000 | -1.646553000 | 0.868629000  |
| N | -5.249689000 | -1.992341000 | 0.838384000  |
| H | -5.212248000 | -2.998360000 | 0.772974000  |
| C | -4.179086000 | -1.168145000 | 0.866840000  |
| H | -3.136423000 | -1.471701000 | 0.827495000  |

TS2<sub>1.1.2</sub>

|   |             |              |              |
|---|-------------|--------------|--------------|
| C | 3.702321000 | -0.208239000 | -1.118092000 |
| H | 3.105504000 | -0.127762000 | -2.019780000 |
| C | 5.078529000 | -0.029127000 | -1.203460000 |
| H | 5.554383000 | 0.195339000  | -2.152336000 |
| C | 5.870833000 | -0.139976000 | -0.069132000 |
| O | 7.222555000 | 0.034503000  | -0.154049000 |
| H | 7.603412000 | -0.069055000 | 0.730310000  |
| C | 5.270746000 | -0.436704000 | 1.155276000  |
| O | 6.131377000 | -0.531578000 | 2.221954000  |
| H | 5.649001000 | -0.689588000 | 3.042773000  |
| C | 3.900306000 | -0.618775000 | 1.239889000  |
| H | 3.449993000 | -0.847785000 | 2.202658000  |

|   |              |              |              |
|---|--------------|--------------|--------------|
| C | 3.086022000  | -0.500860000 | 0.104709000  |
| C | 1.635632000  | -0.692735000 | 0.258954000  |
| H | 1.301857000  | -1.067341000 | 1.224299000  |
| C | 0.687818000  | -0.428521000 | -0.641996000 |
| H | 0.905898000  | -0.038221000 | -1.630115000 |
| C | -0.757865000 | -0.722757000 | -0.355633000 |
| O | -1.135043000 | -1.009877000 | 0.793786000  |
| O | -1.494297000 | 0.686464000  | -1.013770000 |
| P | -1.704658000 | 2.078098000  | -0.331131000 |
| O | -2.133570000 | 3.130005000  | -1.306363000 |
| O | -2.629579000 | 1.932930000  | 0.946625000  |
| O | -0.330435000 | 2.507170000  | 0.424322000  |
| C | 0.700275000  | 3.132577000  | -0.335298000 |
| H | 1.126033000  | 2.438100000  | -1.065948000 |
| H | 0.316787000  | 4.015569000  | -0.852736000 |
| H | 1.478327000  | 3.425253000  | 0.371060000  |
| S | -1.436032000 | -1.820850000 | -1.769411000 |
| C | -0.825295000 | -3.407029000 | -1.130701000 |
| H | 0.266976000  | -3.430690000 | -1.100480000 |
| H | -1.215677000 | -3.593952000 | -0.128586000 |
| H | -1.175198000 | -4.193015000 | -1.803162000 |
| N | -4.593459000 | 0.169108000  | 0.937665000  |
| H | -3.403987000 | 1.272749000  | 0.893917000  |
| C | -5.969618000 | 0.177730000  | 0.941220000  |
| H | -6.532625000 | 1.098744000  | 0.963515000  |
| C | -6.435276000 | -1.105441000 | 0.907875000  |
| H | -7.433035000 | -1.513958000 | 0.896212000  |
| N | -5.310900000 | -1.901007000 | 0.885000000  |
| H | -5.292423000 | -2.908719000 | 0.841580000  |
| C | -4.225140000 | -1.095098000 | 0.901751000  |
| H | -3.192124000 | -1.427456000 | 0.873487000  |

P<sub>1.1.2</sub>

|   |              |             |              |
|---|--------------|-------------|--------------|
| C | 1.003355000  | 3.411103000 | 0.369191000  |
| H | 2.025915000  | 3.753242000 | 0.483278000  |
| C | -0.033310000 | 4.311827000 | 0.566528000  |
| H | 0.161894000  | 5.345990000 | 0.829253000  |
| C | -1.350590000 | 3.887862000 | 0.436395000  |
| O | -2.373915000 | 4.757326000 | 0.636096000  |
| H | -3.202012000 | 4.265652000 | 0.508578000  |
| C | -1.638062000 | 2.556330000 | 0.102593000  |
| O | -2.957876000 | 2.260692000 | 0.002575000  |
| H | -3.136356000 | 1.280825000 | -0.014259000 |
| C | -0.603099000 | 1.660833000 | -0.108804000 |

|   |              |              |              |
|---|--------------|--------------|--------------|
| H | -0.847949000 | 0.642355000  | -0.405757000 |
| C | 0.733559000  | 2.077244000  | 0.030471000  |
| C | 1.778042000  | 1.085309000  | -0.174589000 |
| H | 1.422639000  | 0.084496000  | -0.402949000 |
| C | 3.113248000  | 1.256841000  | -0.110025000 |
| H | 3.563179000  | 2.224440000  | 0.086686000  |
| C | 4.025066000  | 0.134476000  | -0.316160000 |
| O | 3.697479000  | -1.039417000 | -0.460811000 |
| O | -1.946800000 | -1.031480000 | -1.468750000 |
| P | -3.292972000 | -1.453267000 | -0.941645000 |
| O | -4.502599000 | -1.590980000 | -1.817858000 |
| O | -3.173179000 | -2.785538000 | -0.033005000 |
| O | -3.630634000 | -0.279183000 | 0.215676000  |
| C | -4.865952000 | -0.366125000 | 0.924520000  |
| H | -5.709771000 | -0.323396000 | 0.231420000  |
| H | -4.908462000 | -1.298976000 | 1.493670000  |
| H | -4.906066000 | 0.481091000  | 1.611917000  |
| S | 5.738774000  | 0.614153000  | -0.342921000 |
| C | 6.523754000  | -0.993176000 | -0.608958000 |
| H | 6.279476000  | -1.676680000 | 0.203754000  |
| H | 6.203386000  | -1.421746000 | -1.558138000 |
| H | 7.598998000  | -0.813109000 | -0.629281000 |
| N | -0.593595000 | -3.251730000 | 0.791368000  |
| H | -2.254477000 | -2.963787000 | 0.317644000  |
| C | 0.165275000  | -3.897793000 | 1.739666000  |
| H | -0.277956000 | -4.561277000 | 2.467689000  |
| C | 1.481830000  | -3.558560000 | 1.586629000  |
| H | 2.369547000  | -3.847899000 | 2.126564000  |
| N | 1.519928000  | -2.692062000 | 0.520009000  |
| H | 2.334788000  | -2.197618000 | 0.155697000  |
| C | 0.253395000  | -2.536939000 | 0.076193000  |
| H | -0.045774000 | -1.901244000 | -0.747276000 |

R<sub>1,2,1</sub>

|   |             |              |              |
|---|-------------|--------------|--------------|
| C | 2.691881000 | -1.182815000 | -0.216874000 |
| H | 2.591974000 | -1.814515000 | -1.097263000 |
| C | 4.016314000 | -0.614893000 | 0.011517000  |
| C | 5.019345000 | -0.869525000 | -0.938031000 |
| C | 4.335796000 | 0.166001000  | 1.129983000  |
| C | 6.292068000 | -0.355589000 | -0.773143000 |
| H | 4.794479000 | -1.475219000 | -1.811895000 |
| C | 5.612225000 | 0.683683000  | 1.294013000  |
| H | 3.587705000 | 0.369698000  | 1.887537000  |
| C | 6.596104000 | 0.428027000  | 0.346037000  |

|   |              |              |              |
|---|--------------|--------------|--------------|
| H | 5.866616000  | 1.286119000  | 2.159003000  |
| O | 7.842275000  | 0.934397000  | 0.510938000  |
| H | 8.400687000  | 0.651798000  | -0.229337000 |
| O | 7.331691000  | -0.547352000 | -1.641819000 |
| H | 7.084148000  | -1.128998000 | -2.371414000 |
| C | 1.586200000  | -1.015151000 | 0.528524000  |
| H | 1.572806000  | -0.403034000 | 1.424710000  |
| C | 0.331975000  | -1.679353000 | 0.147459000  |
| O | 0.192072000  | -2.430564000 | -0.797530000 |
| C | -4.487511000 | -0.174598000 | -2.062223000 |
| H | -4.435681000 | -1.145044000 | -2.540892000 |
| H | -3.997278000 | 0.667825000  | -2.540581000 |
| C | -5.217211000 | 0.018730000  | -0.926939000 |
| O | -5.330351000 | 1.074675000  | -0.217475000 |
| S | -1.031590000 | -1.281330000 | 1.247855000  |
| C | -2.374379000 | -2.239622000 | 0.498245000  |
| H | -3.130103000 | -2.380784000 | 1.270548000  |
| H | -2.812033000 | -1.708569000 | -0.347729000 |
| H | -1.982840000 | -3.205162000 | 0.179613000  |
| S | -6.199290000 | -1.452521000 | -0.385859000 |
| C | -6.447408000 | -1.072449000 | 1.367964000  |
| H | -6.554616000 | 0.008453000  | 1.468579000  |
| H | -7.361238000 | -1.568409000 | 1.698370000  |
| H | -5.611223000 | -1.414973000 | 1.982382000  |
| C | -1.383876000 | 4.094875000  | -0.163366000 |
| C | -0.739305000 | 2.972563000  | 0.240588000  |
| N | -1.688931000 | 1.972343000  | 0.298422000  |
| C | -2.881153000 | 2.446795000  | -0.055747000 |
| N | -2.706366000 | 3.738343000  | -0.338477000 |
| H | 0.296012000  | 2.801880000  | 0.484827000  |
| H | -3.847673000 | 1.887606000  | -0.116326000 |
| H | -1.024969000 | 5.095198000  | -0.339125000 |
| H | -1.516280000 | 1.001229000  | 0.567471000  |
| H | -3.451223000 | 4.352394000  | -0.640987000 |

TS<sub>1,2,1</sub>

|   |             |              |              |
|---|-------------|--------------|--------------|
| C | 1.810640000 | -1.111917000 | 0.389978000  |
| H | 1.857594000 | -2.178517000 | 0.598034000  |
| C | 3.078547000 | -0.469007000 | 0.023855000  |
| C | 4.262601000 | -1.212246000 | 0.138458000  |
| C | 3.169755000 | 0.848437000  | -0.441874000 |
| C | 5.486502000 | -0.653857000 | -0.188896000 |
| H | 4.221470000 | -2.240027000 | 0.489838000  |
| C | 4.397910000 | 1.409088000  | -0.770518000 |

|   |              |              |              |
|---|--------------|--------------|--------------|
| H | 2.273030000  | 1.445673000  | -0.562629000 |
| C | 5.562862000  | 0.664217000  | -0.645480000 |
| H | 4.467909000  | 2.427984000  | -1.136204000 |
| O | 6.764891000  | 1.215286000  | -0.971312000 |
| H | 7.459726000  | 0.554403000  | -0.833754000 |
| O | 6.687111000  | -1.310210000 | -0.102185000 |
| H | 6.569700000  | -2.217850000 | 0.204656000  |
| C | 0.611972000  | -0.525322000 | 0.498193000  |
| H | 0.471561000  | 0.536060000  | 0.328114000  |
| C | -0.594328000 | -1.306550000 | 0.878885000  |
| O | -0.570694000 | -2.513583000 | 1.093327000  |
| C | -1.493014000 | -0.931863000 | -1.202893000 |
| H | -0.880115000 | -1.759700000 | -1.540449000 |
| H | -1.140560000 | 0.060748000  | -1.469242000 |
| C | -2.889746000 | -1.101563000 | -1.199437000 |
| O | -3.758128000 | -0.203981000 | -1.106659000 |
| S | -1.875267000 | -0.296419000 | 1.796629000  |
| C | -1.183608000 | -0.469212000 | 3.472091000  |
| H | -1.864376000 | 0.032163000  | 4.161963000  |
| H | -1.125663000 | -1.525748000 | 3.735420000  |
| H | -0.194221000 | -0.014367000 | 3.547228000  |
| S | -3.439135000 | -2.823434000 | -1.274027000 |
| C | -5.217737000 | -2.620896000 | -1.008348000 |
| H | -5.651607000 | -1.977610000 | -1.773449000 |
| H | -5.658504000 | -3.617182000 | -1.072179000 |
| H | -5.415895000 | -2.197080000 | -0.023769000 |
| C | -2.517057000 | 4.697540000  | -0.227461000 |
| C | -1.896113000 | 3.980777000  | 0.744057000  |
| N | -2.218711000 | 2.658574000  | 0.527399000  |
| C | -3.009547000 | 2.552792000  | -0.533865000 |
| N | -3.200394000 | 3.784916000  | -1.006489000 |
| H | -1.263843000 | 4.296249000  | 1.557455000  |
| H | -3.395150000 | 1.598069000  | -0.916279000 |
| H | -2.533046000 | 5.755577000  | -0.429700000 |
| H | -1.931331000 | 1.828427000  | 1.077356000  |
| H | -3.765783000 | 4.003349000  | -1.816259000 |

P<sub>1,2,1</sub>

|   |             |              |              |
|---|-------------|--------------|--------------|
| C | 0.965884000 | -1.779935000 | -1.021019000 |
| H | 1.117133000 | -2.835062000 | -1.242407000 |
| C | 2.148075000 | -1.049290000 | -0.581531000 |
| C | 3.364772000 | -1.747149000 | -0.499801000 |
| C | 2.125225000 | 0.309216000  | -0.235885000 |
| C | 4.517981000 | -1.105293000 | -0.089403000 |

|   |              |              |              |
|---|--------------|--------------|--------------|
| H | 3.400789000  | -2.801439000 | -0.761604000 |
| C | 3.284512000  | 0.949359000  | 0.178695000  |
| H | 1.200386000  | 0.874718000  | -0.288100000 |
| C | 4.484029000  | 0.250885000  | 0.253502000  |
| H | 3.277722000  | 1.998764000  | 0.452626000  |
| O | 5.613212000  | 0.884435000  | 0.657625000  |
| H | 6.348869000  | 0.253454000  | 0.654352000  |
| O | 5.748103000  | -1.698486000 | 0.019154000  |
| H | 5.716705000  | -2.628842000 | -0.235851000 |
| C | -0.284827000 | -1.311519000 | -1.187205000 |
| H | -0.541965000 | -0.272375000 | -1.000086000 |
| C | -1.350613000 | -2.213399000 | -1.650011000 |
| O | -1.170736000 | -3.397696000 | -1.901597000 |
| C | -2.734937000 | -1.601407000 | -1.849010000 |
| H | -3.394844000 | -2.385048000 | -2.228433000 |
| H | -2.674717000 | -0.795723000 | -2.586011000 |
| C | -3.342610000 | -1.001040000 | -0.593654000 |
| O | -3.720949000 | 0.151593000  | -0.532567000 |
| S | -0.876050000 | 1.282738000  | 2.867070000  |
| C | -0.088776000 | -0.361631000 | 2.810571000  |
| H | 0.955627000  | -0.286573000 | 2.508091000  |
| H | -0.134900000 | -0.768522000 | 3.821509000  |
| H | -0.621492000 | -1.032414000 | 2.135829000  |
| S | -3.482828000 | -2.122222000 | 0.767854000  |
| C | -4.203851000 | -1.022263000 | 2.012491000  |
| H | -5.151678000 | -0.619916000 | 1.656426000  |
| H | -4.371690000 | -1.632942000 | 2.900085000  |
| H | -3.514494000 | -0.210309000 | 2.246015000  |
| C | -0.640365000 | 4.570833000  | -1.458220000 |
| C | 0.119819000  | 3.661817000  | -0.777212000 |
| N | -0.626643000 | 2.541873000  | -0.481807000 |
| C | -1.824361000 | 2.773409000  | -0.977609000 |
| N | -1.879376000 | 3.987518000  | -1.578297000 |
| H | 1.155449000  | 3.749012000  | -0.482722000 |
| H | -2.668496000 | 2.099514000  | -0.925782000 |
| H | -0.420697000 | 5.549090000  | -1.855223000 |
| H | -0.701345000 | 1.626926000  | 1.571592000  |
| H | -2.688976000 | 4.389367000  | -2.027476000 |

R<sub>1,2,2</sub>

|   |              |             |              |
|---|--------------|-------------|--------------|
| C | -2.019571000 | 1.634541000 | 0.084219000  |
| H | -2.366905000 | 2.612419000 | 0.412431000  |
| C | -3.049249000 | 0.724958000 | -0.412589000 |
| C | -4.382156000 | 1.165991000 | -0.418458000 |

|   |              |              |              |
|---|--------------|--------------|--------------|
| C | -2.770159000 | -0.564464000 | -0.884993000 |
| C | -5.394494000 | 0.346246000  | -0.882988000 |
| H | -4.623025000 | 2.161519000  | -0.054657000 |
| C | -3.786903000 | -1.388017000 | -1.347378000 |
| H | -1.750354000 | -0.931426000 | -0.900204000 |
| C | -5.102463000 | -0.939761000 | -1.349318000 |
| H | -3.575315000 | -2.385030000 | -1.718043000 |
| O | -6.093908000 | -1.747485000 | -1.803991000 |
| H | -6.937692000 | -1.273755000 | -1.749847000 |
| O | -6.719221000 | 0.691441000  | -0.927775000 |
| H | -6.855083000 | 1.607416000  | -0.655281000 |
| C | -0.701456000 | 1.396384000  | 0.183349000  |
| H | -0.255290000 | 0.456856000  | -0.118838000 |
| C | 0.209401000  | 2.419492000  | 0.722603000  |
| O | -0.160615000 | 3.534761000  | 1.065391000  |
| C | 1.673937000  | 2.030548000  | 0.887366000  |
| H | 1.719078000  | 1.097905000  | 1.467931000  |
| H | 2.177720000  | 2.820848000  | 1.444955000  |
| C | 2.374482000  | 1.765393000  | -0.430197000 |
| O | 1.953423000  | 1.007479000  | -1.279541000 |
| S | 3.896563000  | 2.654171000  | -0.616121000 |
| C | 4.439290000  | 2.024309000  | -2.223203000 |
| H | 3.709116000  | 2.270339000  | -2.993728000 |
| H | 5.388758000  | 2.512520000  | -2.444548000 |
| H | 4.579972000  | 0.944627000  | -2.175323000 |
| C | 0.318697000  | -0.105497000 | 3.987442000  |
| C | -0.956978000 | -0.591428000 | 4.069060000  |
| N | -1.068334000 | -1.488252000 | 3.033689000  |
| C | 0.118297000  | -1.508613000 | 2.376940000  |
| N | 0.983128000  | -0.683045000 | 2.927987000  |
| H | -1.770067000 | -0.387426000 | 4.747477000  |
| H | 0.307626000  | -2.128747000 | 1.510683000  |
| H | 0.794766000  | 0.624775000  | 4.625650000  |
| H | -1.887115000 | -2.027960000 | 2.794790000  |
| H | 3.088285000  | -1.966080000 | 1.936000000  |
| C | 3.534667000  | -2.704055000 | 1.261928000  |
| H | 4.615702000  | -2.563323000 | 1.225030000  |
| H | 3.308817000  | -3.698993000 | 1.654426000  |
| C | 2.886060000  | -2.559259000 | -0.088293000 |
| O | 1.692268000  | -2.705181000 | -0.268885000 |
| S | 3.999413000  | -2.151971000 | -1.407122000 |
| C | 2.834618000  | -1.979961000 | -2.781178000 |
| H | 2.192649000  | -1.115378000 | -2.613221000 |
| H | 3.432062000  | -1.831770000 | -3.681423000 |



|   |             |              |              |
|---|-------------|--------------|--------------|
| H | 2.235406000 | -2.884426000 | -2.881568000 |
|---|-------------|--------------|--------------|

TS<sub>1,2,2</sub>

|   |              |              |              |
|---|--------------|--------------|--------------|
| C | -2.826872000 | -0.470476000 | -0.883081000 |
| H | -2.697765000 | -1.177276000 | -1.700870000 |
| C | -4.203180000 | -0.247213000 | -0.445805000 |
| C | -5.233924000 | -0.921229000 | -1.119817000 |
| C | -4.543266000 | 0.604717000  | 0.613056000  |
| C | -6.554004000 | -0.745164000 | -0.747088000 |
| H | -4.993561000 | -1.588456000 | -1.943526000 |
| C | -5.868005000 | 0.781079000  | 0.986561000  |
| H | -3.769644000 | 1.135578000  | 1.155616000  |
| C | -6.879697000 | 0.109508000  | 0.310802000  |
| H | -6.135956000 | 1.438959000  | 1.806019000  |
| O | -8.174964000 | 0.284052000  | 0.679390000  |
| H | -8.741193000 | -0.255343000 | 0.107111000  |
| O | -7.622950000 | -1.359331000 | -1.345861000 |
| H | -7.340651000 | -1.936435000 | -2.066151000 |
| C | -1.710888000 | 0.095719000  | -0.395759000 |
| H | -1.724611000 | 0.810068000  | 0.419554000  |
| C | -0.390438000 | -0.238116000 | -0.959547000 |
| O | -0.239008000 | -1.063702000 | -1.854557000 |
| C | 0.813509000  | 0.516907000  | -0.417007000 |
| H | 0.672172000  | 1.585151000  | -0.614127000 |
| H | 1.698424000  | 0.173402000  | -0.951394000 |
| C | 0.980980000  | 0.375833000  | 1.090896000  |
| O | 0.269038000  | 0.971242000  | 1.894111000  |
| S | 1.468004000  | -1.392581000 | 1.509557000  |
| C | 1.632546000  | -1.234553000 | 3.302554000  |
| H | 0.819517000  | -0.602423000 | 3.661714000  |
| H | 1.548852000  | -2.229069000 | 3.741351000  |
| H | 2.591342000  | -0.789355000 | 3.573408000  |
| C | 4.841223000  | -3.393544000 | -0.168956000 |
| C | 5.925290000  | -3.230164000 | -0.968953000 |
| N | 5.962209000  | -1.890876000 | -1.301831000 |
| C | 4.940884000  | -1.251766000 | -0.730639000 |
| N | 4.253945000  | -2.153488000 | -0.038520000 |
| H | 6.658597000  | -3.934454000 | -1.324950000 |
| H | 4.688720000  | -0.184309000 | -0.799591000 |
| H | 4.442308000  | -4.273065000 | 0.308792000  |
| H | 6.652545000  | -1.445895000 | -1.892058000 |
| H | 3.398138000  | -1.931203000 | 0.500258000  |
| C | 2.989126000  | 1.362704000  | 1.351287000  |
| H | 2.613592000  | 1.972465000  | 2.164683000  |

|   |             |             |              |
|---|-------------|-------------|--------------|
| H | 3.610743000 | 0.520282000 | 1.638800000  |
| C | 3.354660000 | 2.009506000 | 0.160153000  |
| O | 4.008982000 | 1.526428000 | -0.792242000 |
| S | 2.681461000 | 3.685596000 | -0.025925000 |
| C | 3.145060000 | 4.050432000 | -1.737483000 |
| H | 2.628639000 | 3.388556000 | -2.433089000 |
| H | 2.847228000 | 5.082726000 | -1.928161000 |
| H | 4.221254000 | 3.947816000 | -1.872822000 |

P<sub>1,2,2</sub>

|   |              |              |              |
|---|--------------|--------------|--------------|
| C | -2.155873000 | -0.333925000 | -0.994419000 |
| H | -1.632906000 | -1.216610000 | -1.357722000 |
| C | -3.528808000 | -0.545630000 | -0.551236000 |
| C | -4.045360000 | -1.851078000 | -0.588834000 |
| C | -4.356073000 | 0.488599000  | -0.093477000 |
| C | -5.340417000 | -2.108178000 | -0.180433000 |
| H | -3.420769000 | -2.668970000 | -0.937944000 |
| C | -5.656475000 | 0.230527000  | 0.313835000  |
| H | -3.986153000 | 1.506374000  | -0.051677000 |
| C | -6.156062000 | -1.065992000 | 0.273742000  |
| H | -6.300703000 | 1.026430000  | 0.670701000  |
| O | -7.427888000 | -1.314727000 | 0.673205000  |
| H | -7.603839000 | -2.264754000 | 0.596176000  |
| O | -5.929092000 | -3.344834000 | -0.182247000 |
| H | -5.306697000 | -4.031908000 | -0.450953000 |
| C | -1.462972000 | 0.818769000  | -1.002767000 |
| H | -1.885330000 | 1.750568000  | -0.642557000 |
| C | -0.079283000 | 0.856693000  | -1.491960000 |
| O | 0.495203000  | -0.110034000 | -1.976888000 |
| C | 0.641520000  | 2.203897000  | -1.415031000 |
| H | 0.105869000  | 2.908560000  | -2.058290000 |
| H | 1.655123000  | 2.053478000  | -1.783088000 |
| C | 0.645191000  | 2.797096000  | -0.019071000 |
| O | -0.192910000 | 3.614155000  | 0.311272000  |
| S | 1.369502000  | -1.011915000 | 2.409420000  |
| C | 2.967572000  | -0.601722000 | 3.213056000  |
| H | 3.201643000  | 0.463055000  | 3.115172000  |
| H | 2.936017000  | -0.837499000 | 4.279427000  |
| H | 3.793308000  | -1.168221000 | 2.770372000  |
| C | 2.691795000  | -3.568217000 | -0.396323000 |
| C | 3.285418000  | -3.621280000 | -1.618476000 |
| N | 3.511300000  | -2.311606000 | -1.989764000 |
| C | 3.065227000  | -1.498878000 | -1.025682000 |
| N | 2.569913000  | -2.242071000 | -0.052360000 |

|   |             |              |              |
|---|-------------|--------------|--------------|
| H | 3.562333000 | -4.453399000 | -2.244371000 |
| H | 3.098939000 | -0.418202000 | -1.035137000 |
| H | 2.348746000 | -4.358285000 | 0.251924000  |
| H | 3.930759000 | -2.003199000 | -2.855986000 |
| H | 2.095710000 | -1.821672000 | 0.864368000  |
| C | 1.670357000 | 2.320431000  | 0.996101000  |
| H | 1.550275000 | 2.931993000  | 1.891195000  |
| H | 1.433730000 | 1.269299000  | 1.266182000  |
| C | 3.101521000 | 2.329771000  | 0.511707000  |
| O | 3.514164000 | 1.620822000  | -0.388958000 |
| S | 4.143540000 | 3.462458000  | 1.377803000  |
| C | 5.724236000 | 3.145532000  | 0.556926000  |
| H | 5.650024000 | 3.361192000  | -0.508518000 |
| H | 6.452434000 | 3.812642000  | 1.018849000  |
| H | 6.027919000 | 2.109557000  | 0.705440000  |

R<sub>1.3.1</sub>

|   |              |              |              |
|---|--------------|--------------|--------------|
| C | 1.912872000  | -0.565944000 | 0.039704000  |
| H | 1.664857000  | -1.386284000 | 0.710883000  |
| C | 3.319675000  | -0.179651000 | 0.000488000  |
| C | 4.224833000  | -0.891120000 | 0.804416000  |
| C | 3.809272000  | 0.865025000  | -0.794310000 |
| C | 5.568223000  | -0.565157000 | 0.812321000  |
| H | 3.867294000  | -1.706582000 | 1.427206000  |
| C | 5.157984000  | 1.189880000  | -0.788858000 |
| H | 3.135491000  | 1.435330000  | -1.423215000 |
| C | 6.044176000  | 0.479376000  | 0.012333000  |
| H | 5.542588000  | 1.998022000  | -1.401183000 |
| O | 7.361639000  | 0.801665000  | 0.016498000  |
| H | 7.829503000  | 0.214271000  | 0.629301000  |
| O | 6.521558000  | -1.199358000 | 1.563276000  |
| H | 6.134826000  | -1.885469000 | 2.121574000  |
| C | 0.890140000  | -0.031421000 | -0.648705000 |
| H | 1.023081000  | 0.792304000  | -1.342636000 |
| C | -0.476656000 | -0.547120000 | -0.475324000 |
| O | -0.761868000 | -1.459696000 | 0.291606000  |
| C | -1.555352000 | 0.130573000  | -1.300531000 |
| C | -2.918105000 | -0.473667000 | -1.057859000 |
| O | -3.822115000 | 0.171838000  | -0.562978000 |
| C | -3.144480000 | -1.912930000 | -1.489352000 |
| C | -3.329369000 | -2.925120000 | -0.364894000 |
| O | -2.810422000 | -4.018996000 | -0.420956000 |
| H | -4.062607000 | -1.926770000 | -2.087898000 |
| H | -2.323307000 | -2.286141000 | -2.101206000 |

|   |              |              |              |
|---|--------------|--------------|--------------|
| H | -1.294058000 | 0.032478000  | -2.362512000 |
| S | -4.411062000 | -2.462320000 | 0.962020000  |
| C | -4.331948000 | -3.985017000 | 1.938267000  |
| H | -4.687772000 | -4.834889000 | 1.356675000  |
| H | -3.311802000 | -4.170238000 | 2.273283000  |
| H | -4.980920000 | -3.828384000 | 2.800590000  |
| C | -1.405778000 | 4.751412000  | 0.048589000  |
| C | -2.371703000 | 5.345326000  | 0.813229000  |
| N | -3.361399000 | 4.399984000  | 0.942278000  |
| C | -2.964048000 | 3.293482000  | 0.264940000  |
| N | -1.783763000 | 3.470901000  | -0.289168000 |
| H | -2.443276000 | 6.322459000  | 1.263961000  |
| H | -3.555914000 | 2.389915000  | 0.201948000  |
| H | -0.463936000 | 5.169135000  | -0.276290000 |
| H | -1.570048000 | 1.201638000  | -1.065570000 |
| H | -4.227089000 | 4.504651000  | 1.450286000  |

TS1<sub>1.3.1</sub>

|   |              |              |              |
|---|--------------|--------------|--------------|
| C | 2.094680000  | -0.637656000 | -0.193749000 |
| H | 1.856718000  | -1.534863000 | 0.375046000  |
| C | 3.496422000  | -0.214054000 | -0.165157000 |
| C | 4.406797000  | -0.979908000 | 0.578988000  |
| C | 3.975758000  | 0.915167000  | -0.840872000 |
| C | 5.743215000  | -0.627103000 | 0.642854000  |
| H | 4.060382000  | -1.862171000 | 1.110973000  |
| C | 5.316551000  | 1.269892000  | -0.776241000 |
| H | 3.300137000  | 1.527668000  | -1.426897000 |
| C | 6.207500000  | 0.503325000  | -0.035582000 |
| H | 5.690724000  | 2.143186000  | -1.299433000 |
| O | 7.519555000  | 0.853447000  | 0.025218000  |
| H | 7.992069000  | 0.209526000  | 0.573823000  |
| O | 6.697552000  | -1.316392000 | 1.344450000  |
| H | 6.324114000  | -2.095987000 | 1.774058000  |
| C | 1.071972000  | -0.057953000 | -0.836979000 |
| H | 1.205299000  | 0.839284000  | -1.434381000 |
| C | -0.300655000 | -0.630033000 | -0.768204000 |
| O | -0.528031000 | -1.652275000 | -0.105353000 |
| C | -1.337538000 | 0.122809000  | -1.457048000 |
| C | -2.615098000 | -0.456915000 | -1.850238000 |
| O | -3.447691000 | 0.222193000  | -2.463490000 |
| C | -2.962948000 | -1.908840000 | -1.541013000 |
| C | -3.346284000 | -2.277772000 | -0.121367000 |
| O | -3.277011000 | -3.416690000 | 0.285664000  |
| H | -3.823409000 | -2.163157000 | -2.168616000 |

|   |              |              |              |
|---|--------------|--------------|--------------|
| H | -2.127773000 | -2.562923000 | -1.796077000 |
| H | -0.982167000 | 0.847085000  | -2.191686000 |
| S | -4.024117000 | -0.969962000 | 0.877438000  |
| C | -4.376698000 | -1.895471000 | 2.391973000  |
| H | -5.093242000 | -2.692228000 | 2.195012000  |
| H | -3.458904000 | -2.319624000 | 2.798220000  |
| H | -4.800747000 | -1.182956000 | 3.100264000  |
| C | -1.944036000 | 2.697130000  | 1.256168000  |
| C | -2.829588000 | 3.691451000  | 1.545933000  |
| N | -3.741131000 | 3.696464000  | 0.513299000  |
| C | -3.403260000 | 2.733197000  | -0.360073000 |
| N | -2.317771000 | 2.116791000  | 0.067249000  |
| H | -2.892225000 | 4.379335000  | 2.373249000  |
| H | -3.939601000 | 2.490664000  | -1.264935000 |
| H | -1.080841000 | 2.360957000  | 1.808826000  |
| H | -1.792398000 | 1.122586000  | -0.561607000 |
| H | -4.535690000 | 4.314357000  | 0.423046000  |

#### IM<sub>1.3.1</sub>

|   |              |              |              |
|---|--------------|--------------|--------------|
| C | 2.177059000  | -0.759007000 | -0.269652000 |
| H | 1.961923000  | -1.721227000 | 0.191551000  |
| C | 3.568419000  | -0.301679000 | -0.187509000 |
| C | 4.491960000  | -1.099795000 | 0.503906000  |
| C | 4.025987000  | 0.890991000  | -0.761719000 |
| C | 5.816932000  | -0.715711000 | 0.618716000  |
| H | 4.164914000  | -2.032474000 | 0.956281000  |
| C | 5.355518000  | 1.276547000  | -0.647115000 |
| H | 3.341934000  | 1.528581000  | -1.310150000 |
| C | 6.258323000  | 0.478282000  | 0.043282000  |
| H | 5.711277000  | 2.198844000  | -1.093761000 |
| O | 7.560485000  | 0.859012000  | 0.154194000  |
| H | 8.042494000  | 0.184296000  | 0.655181000  |
| O | 6.780058000  | -1.435350000 | 1.278150000  |
| H | 6.419762000  | -2.255156000 | 1.638418000  |
| C | 1.140356000  | -0.136019000 | -0.843323000 |
| H | 1.254887000  | 0.828942000  | -1.330120000 |
| C | -0.225632000 | -0.742423000 | -0.851850000 |
| O | -0.413340000 | -1.858742000 | -0.322527000 |
| C | -1.242661000 | 0.048736000  | -1.468030000 |
| C | -2.568929000 | -0.364721000 | -1.738531000 |
| O | -3.437079000 | 0.420965000  | -2.199761000 |
| C | -2.990902000 | -1.812610000 | -1.510050000 |
| C | -3.337743000 | -2.242603000 | -0.100510000 |
| O | -3.370190000 | -3.407156000 | 0.231257000  |

|   |              |              |              |
|---|--------------|--------------|--------------|
| H | -3.893781000 | -1.975211000 | -2.108593000 |
| H | -2.211875000 | -2.502564000 | -1.836265000 |
| H | -0.948515000 | 0.999119000  | -1.907810000 |
| S | -3.814924000 | -0.948595000 | 1.034072000  |
| C | -4.178198000 | -1.947363000 | 2.498511000  |
| H | -4.992501000 | -2.642285000 | 2.295536000  |
| H | -3.292520000 | -2.501955000 | 2.806831000  |
| H | -4.472491000 | -1.252349000 | 3.285759000  |
| C | -2.286879000 | 3.039976000  | 1.259336000  |
| C | -3.264707000 | 3.976921000  | 1.361481000  |
| N | -4.127114000 | 3.754497000  | 0.306814000  |
| C | -3.694530000 | 2.720074000  | -0.414119000 |
| N | -2.579587000 | 2.278885000  | 0.150587000  |
| H | -3.420814000 | 4.767000000  | 2.076916000  |
| H | -4.138971000 | 2.278884000  | -1.294760000 |
| H | -1.422002000 | 2.851969000  | 1.873856000  |
| H | -2.042526000 | 1.469934000  | -0.210395000 |
| H | -4.963882000 | 4.285486000  | 0.104059000  |

#### TS2<sub>1.3.1</sub>

|   |              |              |              |
|---|--------------|--------------|--------------|
| C | 1.835696000  | -0.537681000 | -0.418659000 |
| H | 1.687567000  | -1.495531000 | 0.074505000  |
| C | 3.187418000  | 0.020238000  | -0.336735000 |
| C | 4.170614000  | -0.720468000 | 0.337055000  |
| C | 3.551283000  | 1.253480000  | -0.892307000 |
| C | 5.464816000  | -0.243993000 | 0.449000000  |
| H | 3.915396000  | -1.682089000 | 0.774448000  |
| C | 4.849973000  | 1.731902000  | -0.779865000 |
| H | 2.818079000  | 1.852672000  | -1.420025000 |
| C | 5.813648000  | 0.988655000  | -0.110090000 |
| H | 5.134268000  | 2.686123000  | -1.210098000 |
| O | 7.083991000  | 1.460673000  | -0.001461000 |
| H | 7.618771000  | 0.815252000  | 0.484654000  |
| O | 6.483083000  | -0.900688000 | 1.089024000  |
| H | 6.187982000  | -1.749243000 | 1.442277000  |
| C | 0.769726000  | -0.003638000 | -1.033373000 |
| H | 0.828445000  | 0.943899000  | -1.560433000 |
| C | -0.542875000 | -0.663144000 | -1.051952000 |
| O | -0.633892000 | -1.813794000 | -0.458912000 |
| C | -1.610682000 | -0.035397000 | -1.670553000 |
| C | -2.883996000 | -0.663016000 | -1.777282000 |
| O | -3.901499000 | -0.075826000 | -2.200138000 |
| C | -2.971401000 | -2.122941000 | -1.380365000 |
| C | -2.187061000 | -2.513141000 | -0.135926000 |

|   |              |              |              |
|---|--------------|--------------|--------------|
| O | -1.985727000 | -3.688964000 | 0.164553000  |
| H | -4.019358000 | -2.394968000 | -1.234687000 |
| H | -2.573309000 | -2.733154000 | -2.199354000 |
| H | -1.479201000 | 0.954472000  | -2.091866000 |
| S | -2.802190000 | -1.396433000 | 1.330663000  |
| C | -1.736940000 | -2.059654000 | 2.633227000  |
| H | -1.580528000 | -3.116734000 | 2.406911000  |
| H | -0.777373000 | -1.542841000 | 2.668804000  |
| H | -2.248525000 | -1.961802000 | 3.591259000  |
| C | -3.162715000 | 2.838254000  | 1.781684000  |
| C | -3.699515000 | 3.927419000  | 1.174175000  |
| N | -4.089234000 | 3.515629000  | -0.083953000 |
| C | -3.803344000 | 2.223443000  | -0.244473000 |
| N | -3.238437000 | 1.800477000  | 0.879497000  |
| H | -3.836165000 | 4.938806000  | 1.518752000  |
| H | -3.985011000 | 1.609290000  | -1.125858000 |
| H | -2.738606000 | 2.715994000  | 2.764589000  |
| H | -2.930006000 | 0.822762000  | 1.038266000  |
| H | -4.529217000 | 4.094162000  | -0.787464000 |

P<sub>1.3.1</sub>

|   |              |              |              |
|---|--------------|--------------|--------------|
| C | 2.460287000  | -0.553909000 | -0.169197000 |
| H | 2.317856000  | -1.243353000 | 0.658366000  |
| C | 3.791274000  | 0.038512000  | -0.272309000 |
| C | 4.747202000  | -0.313387000 | 0.694282000  |
| C | 4.164009000  | 0.934316000  | -1.283049000 |
| C | 6.024515000  | 0.213922000  | 0.649268000  |
| H | 4.481045000  | -1.005397000 | 1.488745000  |
| C | 5.446158000  | 1.462841000  | -1.328357000 |
| H | 3.452285000  | 1.227480000  | -2.046101000 |
| C | 6.383004000  | 1.107521000  | -0.365536000 |
| H | 5.738666000  | 2.156837000  | -2.108655000 |
| O | 7.636022000  | 1.626392000  | -0.413784000 |
| H | 8.151562000  | 1.277390000  | 0.329005000  |
| O | 7.018639000  | -0.071434000 | 1.546493000  |
| H | 6.713952000  | -0.679101000 | 2.231923000  |
| C | 1.411718000  | -0.331884000 | -0.982114000 |
| H | 1.475507000  | 0.350919000  | -1.822415000 |
| C | 0.121143000  | -0.964519000 | -0.813258000 |
| O | 0.081046000  | -1.846604000 | 0.229866000  |
| C | -0.951299000 | -0.701358000 | -1.597075000 |
| C | -2.216913000 | -1.349932000 | -1.376011000 |
| O | -3.238472000 | -1.081824000 | -2.009784000 |
| C | -2.228764000 | -2.465847000 | -0.359240000 |

|   |              |              |              |
|---|--------------|--------------|--------------|
| C | -1.054033000 | -2.534886000 | 0.573850000  |
| O | -1.008197000 | -3.227348000 | 1.553996000  |
| H | -3.140284000 | -2.428011000 | 0.236548000  |
| H | -2.246421000 | -3.414853000 | -0.912687000 |
| H | -0.869968000 | 0.034900000  | -2.386463000 |
| S | -2.472469000 | 0.404403000  | 1.725700000  |
| C | -1.628987000 | 1.924118000  | 1.140308000  |
| H | -1.203525000 | 2.482427000  | 1.977742000  |
| H | -0.816991000 | 1.677010000  | 0.451169000  |
| H | -2.325147000 | 2.586502000  | 0.614870000  |
| C | -6.114603000 | 1.842019000  | 1.030634000  |
| C | -7.111464000 | 1.901540000  | 0.106512000  |
| N | -6.678452000 | 1.154644000  | -0.968540000 |
| C | -5.461961000 | 0.663181000  | -0.699173000 |
| N | -5.105094000 | 1.070140000  | 0.506592000  |
| H | -8.068758000 | 2.396161000  | 0.116389000  |
| H | -4.864030000 | 0.035806000  | -1.349174000 |
| H | -6.042967000 | 2.281833000  | 2.012395000  |
| H | -4.119211000 | 0.796163000  | 1.005591000  |
| H | -7.189255000 | 0.996418000  | -1.826323000 |

R<sub>1.3.2</sub>

|   |              |              |              |
|---|--------------|--------------|--------------|
| C | -1.420447000 | 0.117399000  | -0.064266000 |
| H | -1.126753000 | 1.158296000  | -0.171646000 |
| C | -2.861401000 | -0.124814000 | 0.014544000  |
| C | -3.721783000 | 0.982911000  | -0.039023000 |
| C | -3.427789000 | -1.399770000 | 0.139723000  |
| C | -5.093447000 | 0.818634000  | 0.031904000  |
| H | -3.308636000 | 1.983238000  | -0.137383000 |
| C | -4.804390000 | -1.564453000 | 0.210722000  |
| H | -2.795403000 | -2.279144000 | 0.181825000  |
| C | -5.645138000 | -0.459781000 | 0.157929000  |
| H | -5.245480000 | -2.550503000 | 0.307435000  |
| O | -6.991736000 | -0.625852000 | 0.228054000  |
| H | -7.419625000 | 0.242060000  | 0.177083000  |
| O | -6.003108000 | 1.841987000  | -0.012532000 |
| H | -5.566877000 | 2.698980000  | -0.097698000 |
| C | -0.442409000 | -0.801795000 | -0.017409000 |
| H | -0.658324000 | -1.859727000 | 0.089818000  |
| C | 0.970308000  | -0.478800000 | -0.104759000 |
| O | 1.242548000  | 0.840812000  | -0.234733000 |
| C | 1.966597000  | -1.396778000 | -0.063535000 |
| C | 3.321406000  | -0.953096000 | -0.163615000 |
| O | 4.253534000  | -1.899554000 | -0.114954000 |



|   |             |              |              |
|---|-------------|--------------|--------------|
| C | 3.593925000 | 0.385099000  | -0.301032000 |
| C | 2.539113000 | 1.341791000  | -0.336513000 |
| O | 2.637994000 | 2.552698000  | -0.444090000 |
| H | 6.989730000 | 1.985316000  | 1.064262000  |
| H | 4.605040000 | 0.757592000  | -0.389100000 |
| H | 1.747515000 | -2.450798000 | 0.041976000  |
| O | 6.733443000 | -1.025405000 | -0.278287000 |
| H | 5.176184000 | -1.529127000 | -0.185567000 |
| H | 7.188260000 | -1.061131000 | -1.127892000 |
| O | 7.573954000 | 1.217070000  | 1.026108000  |
| H | 7.945558000 | 1.112790000  | 1.911156000  |
| H | 7.048517000 | -0.221173000 | 0.191188000  |

TS<sub>1.3.2</sub>

|   |              |              |              |
|---|--------------|--------------|--------------|
| C | -1.211023000 | 0.149587000  | -0.163072000 |
| H | -0.953609000 | 1.205404000  | -0.172211000 |
| C | -2.637843000 | -0.149470000 | -0.041887000 |
| C | -3.533526000 | 0.927323000  | 0.052849000  |
| C | -3.156948000 | -1.450219000 | -0.014861000 |
| C | -4.893891000 | 0.707576000  | 0.172085000  |
| H | -3.156712000 | 1.946563000  | 0.032155000  |
| C | -4.522261000 | -1.670405000 | 0.104063000  |
| H | -2.495859000 | -2.306140000 | -0.087187000 |
| C | -5.398330000 | -0.596288000 | 0.198355000  |
| H | -4.927102000 | -2.676300000 | 0.125099000  |
| O | -6.733443000 | -0.815970000 | 0.315124000  |
| H | -7.190219000 | 0.037086000  | 0.367581000  |
| O | -5.836807000 | 1.696057000  | 0.270977000  |
| H | -5.432901000 | 2.572643000  | 0.253702000  |
| C | -0.205579000 | -0.735780000 | -0.262851000 |
| H | -0.385082000 | -1.805708000 | -0.262174000 |
| C | 1.191271000  | -0.356856000 | -0.381343000 |
| O | 1.405067000  | 0.984901000  | -0.372572000 |
| C | 2.205490000  | -1.247429000 | -0.488472000 |
| C | 3.573667000  | -0.793340000 | -0.587091000 |
| O | 4.519788000  | -1.622591000 | -0.677246000 |
| C | 3.788693000  | 0.628097000  | -0.500139000 |
| C | 2.675072000  | 1.535866000  | -0.550053000 |
| O | 2.710803000  | 2.743471000  | -0.679922000 |
| H | 4.422363000  | 0.746167000  | 0.902379000  |
| H | 4.695347000  | 1.019330000  | -0.957367000 |
| H | 1.999203000  | -2.309840000 | -0.502516000 |
| O | 6.567077000  | -1.011447000 | 0.732725000  |
| H | 5.883150000  | -1.306655000 | 0.043223000  |

|   |             |              |             |
|---|-------------|--------------|-------------|
| H | 7.386477000 | -0.763392000 | 0.286626000 |
| O | 5.155539000 | 0.714412000  | 1.752767000 |
| H | 4.733546000 | 0.451775000  | 2.585238000 |
| H | 5.868465000 | -0.013577000 | 1.425129000 |

P<sub>1.3.2</sub>

|   |              |              |              |
|---|--------------|--------------|--------------|
| C | -1.292975000 | 0.125072000  | -0.162541000 |
| H | -1.030079000 | 1.176601000  | -0.239425000 |
| C | -2.717774000 | -0.156292000 | -0.028031000 |
| C | -3.603372000 | 0.932944000  | 0.025663000  |
| C | -3.246818000 | -1.451627000 | 0.050537000  |
| C | -4.963999000 | 0.730261000  | 0.158627000  |
| H | -3.217171000 | 1.946767000  | -0.036093000 |
| C | -4.612631000 | -1.654690000 | 0.182087000  |
| H | -2.593530000 | -2.315327000 | 0.007413000  |
| C | -5.478535000 | -0.568837000 | 0.237907000  |
| H | -5.027052000 | -2.654888000 | 0.242934000  |
| O | -6.812351000 | -0.772206000 | 0.367668000  |
| H | -7.263444000 | 0.085413000  | 0.392409000  |
| O | -5.899597000 | 1.727073000  | 0.221433000  |
| H | -5.491252000 | 2.600953000  | 0.180491000  |
| C | -0.289705000 | -0.772567000 | -0.196856000 |
| H | -0.472868000 | -1.838557000 | -0.120217000 |
| C | 1.101377000  | -0.406973000 | -0.329620000 |
| O | 1.304300000  | 0.943345000  | -0.426240000 |
| C | 2.116531000  | -1.305647000 | -0.368642000 |
| C | 3.485007000  | -0.884457000 | -0.474713000 |
| O | 4.426834000  | -1.679612000 | -0.543717000 |
| C | 3.744590000  | 0.601087000  | -0.459098000 |
| C | 2.549566000  | 1.496163000  | -0.595786000 |
| O | 2.603712000  | 2.675889000  | -0.812126000 |
| H | 4.237663000  | 0.851501000  | 0.495592000  |
| H | 4.464858000  | 0.869530000  | -1.235713000 |
| H | 1.897028000  | -2.363953000 | -0.313647000 |
| O | 6.932675000  | -1.059248000 | 0.381627000  |
| H | 6.103383000  | -1.326017000 | -0.072168000 |
| H | 7.599687000  | -0.919651000 | -0.300187000 |
| O | 5.896207000  | 0.993139000  | 1.875422000  |
| H | 6.032490000  | 0.875101000  | 2.821964000  |
| H | 6.398485000  | 0.278875000  | 1.426910000  |

R<sub>2.1</sub>

|   |             |              |              |
|---|-------------|--------------|--------------|
| N | 1.407848000 | -3.755626000 | -1.044924000 |
| C | 0.084743000 | -3.944026000 | -0.924260000 |

|   |              |              |              |
|---|--------------|--------------|--------------|
| O | -0.538350000 | -4.928340000 | -1.351476000 |
| N | -0.652020000 | -2.954586000 | -0.243532000 |
| C | -0.171561000 | -1.785069000 | 0.291252000  |
| O | -0.892139000 | -0.998614000 | 0.912054000  |
| C | 1.244177000  | -1.590729000 | 0.051766000  |
| N | 1.872689000  | -0.450166000 | 0.486978000  |
| C | 3.148689000  | -0.148001000 | -0.027440000 |
| C | 3.800624000  | 0.905508000  | 0.804285000  |
| C | 5.108803000  | 0.876328000  | 1.114374000  |
| C | 5.738093000  | 1.983284000  | 1.917314000  |
| C | 5.920578000  | -0.255160000 | 0.682412000  |
| C | 7.393458000  | -0.241964000 | 0.951534000  |
| C | 5.352226000  | -1.348656000 | 0.084989000  |
| C | 3.962849000  | -1.407889000 | -0.164964000 |
| N | 3.343040000  | -2.511311000 | -0.576146000 |
| C | 1.934482000  | -2.622518000 | -0.553333000 |
| C | 4.126067000  | -3.703437000 | -0.936422000 |
| C | 0.271156000  | 2.876147000  | 0.502909000  |
| C | 0.628425000  | 4.046747000  | -0.162947000 |
| O | 2.785332000  | 1.659695000  | -1.552958000 |
| C | -0.299506000 | 4.815339000  | -0.920606000 |
| O | -0.013840000 | 5.884637000  | -1.514179000 |
| C | -1.653952000 | 4.264501000  | -0.979086000 |
| C | -1.963254000 | 3.115318000  | -0.342251000 |
| H | 3.146914000  | 1.715797000  | 1.108520000  |
| H | 6.174964000  | 1.608288000  | 2.848085000  |
| H | 6.538200000  | 2.476954000  | 1.357232000  |
| H | 4.992333000  | 2.737188000  | 2.172683000  |
| H | 7.594714000  | -0.152873000 | 2.023868000  |
| H | 7.875400000  | -1.147998000 | 0.582394000  |
| H | 7.863587000  | 0.622005000  | 0.470606000  |
| H | 5.976287000  | -2.200028000 | -0.149091000 |
| H | 4.892340000  | -3.425642000 | -1.659072000 |
| H | 3.437822000  | -4.420292000 | -1.371363000 |
| H | 1.812684000  | 1.674382000  | -1.521227000 |
| H | -2.408588000 | 4.786398000  | -1.555853000 |
| O | -1.044618000 | 2.437607000  | 0.389658000  |
| O | 0.992479000  | 2.131584000  | 1.200453000  |
| C | -3.270826000 | 2.472020000  | -0.371371000 |
| H | -4.045087000 | 3.032223000  | -0.887073000 |
| C | -3.507754000 | 1.270053000  | 0.176321000  |
| H | -2.673224000 | 0.755438000  | 0.646274000  |
| C | -4.782841000 | 0.546795000  | 0.198829000  |
| C | -4.788390000 | -0.749183000 | 0.736600000  |

|   |              |              |              |
|---|--------------|--------------|--------------|
| C | -5.990635000 | 1.072900000  | -0.275508000 |
| C | -5.957442000 | -1.487832000 | 0.791331000  |
| H | -3.859187000 | -1.172797000 | 1.109809000  |
| C | -7.163376000 | 0.329521000  | -0.221990000 |
| H | -6.025335000 | 2.075336000  | -0.687264000 |
| C | -7.154427000 | -0.953640000 | 0.308734000  |
| H | -8.100180000 | 0.735898000  | -0.588244000 |
| O | -8.306223000 | -1.680593000 | 0.361630000  |
| H | -8.110072000 | -2.544612000 | 0.753325000  |
| O | -6.050226000 | -2.758399000 | 1.301383000  |
| H | -5.192604000 | -3.071583000 | 1.614674000  |
| H | 4.585795000  | -4.127443000 | -0.041531000 |
| H | 1.315612000  | 0.327928000  | 0.874856000  |
| H | -1.643052000 | -3.131955000 | -0.140172000 |
| O | 3.109373000  | 0.270640000  | -1.451667000 |
| H | 1.653049000  | 4.385334000  | -0.072099000 |

TS<sub>2.1</sub>

|   |              |              |              |
|---|--------------|--------------|--------------|
| N | 0.912286000  | -3.663114000 | -1.247553000 |
| C | -0.409613000 | -3.807591000 | -1.072851000 |
| O | -1.106206000 | -4.697930000 | -1.590210000 |
| N | -1.059018000 | -2.887249000 | -0.226201000 |
| C | -0.484409000 | -1.825678000 | 0.427652000  |
| O | -1.129211000 | -1.084880000 | 1.184357000  |
| C | 0.921165000  | -1.678056000 | 0.149736000  |
| N | 1.639049000  | -0.651901000 | 0.725593000  |
| C | 2.866007000  | -0.270649000 | 0.087839000  |
| C | 3.622908000  | 0.621558000  | 1.031178000  |
| C | 4.942936000  | 0.504321000  | 1.254992000  |
| C | 5.672964000  | 1.473546000  | 2.147573000  |
| C | 5.673908000  | -0.590041000 | 0.624301000  |
| C | 7.159110000  | -0.669987000 | 0.802396000  |
| C | 5.028311000  | -1.563989000 | -0.087749000 |
| C | 3.621206000  | -1.542964000 | -0.245215000 |
| N | 2.935932000  | -2.566320000 | -0.747908000 |
| C | 1.523673000  | -2.633134000 | -0.636426000 |
| C | 3.641749000  | -3.717135000 | -1.328940000 |
| C | 0.605805000  | 3.096726000  | 0.787340000  |
| C | 1.271330000  | 3.758117000  | -0.289842000 |
| O | 2.043774000  | 1.902349000  | -0.819674000 |
| C | 0.542418000  | 4.244127000  | -1.435278000 |
| O | 1.043448000  | 4.995555000  | -2.296561000 |
| C | -0.823184000 | 3.747464000  | -1.548164000 |
| C | -1.368187000 | 2.977920000  | -0.580179000 |

|   |              |              |              |
|---|--------------|--------------|--------------|
| H | 3.044061000  | 1.424793000  | 1.476787000  |
| H | 6.145336000  | 0.967108000  | 2.995332000  |
| H | 6.461634000  | 2.003703000  | 1.604417000  |
| H | 4.980185000  | 2.218119000  | 2.542773000  |
| H | 7.423021000  | -0.735899000 | 1.862775000  |
| H | 7.577710000  | -1.534970000 | 0.286380000  |
| H | 7.641474000  | 0.232926000  | 0.413913000  |
| H | 5.603115000  | -2.390667000 | -0.483052000 |
| H | 4.350020000  | -3.366281000 | -2.079044000 |
| H | 2.894093000  | -4.355362000 | -1.788335000 |
| H | 1.627889000  | 1.907964000  | -1.697488000 |
| H | -1.401286000 | 3.997338000  | -2.429429000 |
| O | -0.692199000 | 2.663473000  | 0.559063000  |
| O | 1.078010000  | 2.803297000  | 1.877395000  |
| C | -2.701668000 | 2.400526000  | -0.644985000 |
| H | -3.316796000 | 2.755305000  | -1.466270000 |
| C | -3.131479000 | 1.454780000  | 0.205100000  |
| H | -2.434801000 | 1.092282000  | 0.955059000  |
| C | -4.444620000 | 0.806017000  | 0.203731000  |
| C | -4.599052000 | -0.359234000 | 0.970430000  |
| C | -5.549509000 | 1.289194000  | -0.507237000 |
| C | -5.813954000 | -1.019318000 | 1.009563000  |
| H | -3.744735000 | -0.752067000 | 1.516511000  |
| C | -6.769423000 | 0.625027000  | -0.465272000 |
| H | -5.467228000 | 2.200321000  | -1.089458000 |
| C | -6.908599000 | -0.531756000 | 0.290249000  |
| H | -7.629386000 | 0.998077000  | -1.011204000 |
| O | -8.105893000 | -1.179770000 | 0.333508000  |
| H | -8.014920000 | -1.963461000 | 0.895720000  |
| O | -6.051545000 | -2.164500000 | 1.726987000  |
| H | -5.256764000 | -2.453612000 | 2.192659000  |
| H | 4.165927000  | -4.267749000 | -0.545063000 |
| H | 1.093253000  | 0.082611000  | 1.164593000  |
| H | -2.053062000 | -3.027689000 | -0.097072000 |
| O | 2.738073000  | 0.312591000  | -1.172933000 |
| H | 2.228768000  | 4.207064000  | -0.063136000 |

P<sub>2,1</sub>

|   |              |              |              |
|---|--------------|--------------|--------------|
| N | -0.229753000 | -3.039944000 | 1.545274000  |
| C | 1.078846000  | -3.090350000 | 1.263415000  |
| O | 1.926233000  | -3.738772000 | 1.906262000  |
| N | 1.531099000  | -2.363610000 | 0.146149000  |
| C | 0.767274000  | -1.583741000 | -0.687192000 |
| O | 1.258848000  | -0.992272000 | -1.665059000 |

|   |              |              |              |
|---|--------------|--------------|--------------|
| C | -0.619653000 | -1.531481000 | -0.317282000 |
| N | -1.515034000 | -0.793577000 | -1.070245000 |
| C | -2.712711000 | -0.334313000 | -0.378117000 |
| C | -3.671743000 | 0.148537000  | -1.434974000 |
| C | -4.978132000 | -0.169409000 | -1.469622000 |
| C | -5.913135000 | 0.449091000  | -2.476913000 |
| C | -5.493505000 | -1.120178000 | -0.490144000 |
| C | -6.964052000 | -1.409985000 | -0.463984000 |
| C | -4.665063000 | -1.764557000 | 0.386374000  |
| C | -3.262128000 | -1.551875000 | 0.355625000  |
| N | -2.413935000 | -2.318860000 | 1.034831000  |
| C | -1.021586000 | -2.282827000 | 0.762542000  |
| C | -2.908629000 | -3.298812000 | 2.011194000  |
| C | -0.934248000 | 2.730704000  | -0.769197000 |
| C | -1.773384000 | 3.469707000  | 0.274965000  |
| O | -3.093189000 | 3.058169000  | 0.229093000  |
| C | -1.172317000 | 3.455692000  | 1.688292000  |
| O | -1.856631000 | 3.788564000  | 2.645957000  |
| C | 0.224874000  | 3.100600000  | 1.803832000  |
| C | 0.918028000  | 2.594812000  | 0.761606000  |
| H | -3.259132000 | 0.886130000  | -2.117880000 |
| H | -6.396644000 | -0.307769000 | -3.103262000 |
| H | -6.707567000 | 1.024492000  | -1.990530000 |
| H | -5.365015000 | 1.127930000  | -3.132701000 |
| H | -7.304247000 | -1.798618000 | -1.429307000 |
| H | -7.213926000 | -2.137190000 | 0.309877000  |
| H | -7.533736000 | -0.494152000 | -0.275100000 |
| H | -5.089881000 | -2.489775000 | 1.067902000  |
| H | -3.586826000 | -2.805732000 | 2.707142000  |
| H | -2.048257000 | -3.691486000 | 2.542996000  |
| H | -3.045054000 | 2.045383000  | 0.366883000  |
| H | 0.697875000  | 3.171486000  | 2.775326000  |
| O | 0.369397000  | 2.436857000  | -0.485285000 |
| O | -1.329918000 | 2.451729000  | -1.870225000 |
| C | 2.291518000  | 2.139787000  | 0.837246000  |
| H | 2.797112000  | 2.355764000  | 1.772676000  |
| C | 2.881391000  | 1.439138000  | -0.146954000 |
| H | 2.286941000  | 1.190887000  | -1.021024000 |
| C | 4.243780000  | 0.910046000  | -0.149882000 |
| C | 4.566239000  | -0.048090000 | -1.124170000 |
| C | 5.235315000  | 1.308482000  | 0.754549000  |
| C | 5.835247000  | -0.593842000 | -1.177697000 |
| H | 3.796653000  | -0.376732000 | -1.818467000 |
| C | 6.510808000  | 0.762014000  | 0.695659000  |

|   |              |              |              |
|---|--------------|--------------|--------------|
| H | 5.019396000  | 2.060358000  | 1.505450000  |
| C | 6.817470000  | -0.191224000 | -0.267180000 |
| H | 7.284551000  | 1.067889000  | 1.391484000  |
| O | 8.067358000  | -0.723951000 | -0.324702000 |
| H | 8.092849000  | -1.384046000 | -1.033618000 |
| O | 6.237442000  | -1.537301000 | -2.087623000 |
| H | 5.505860000  | -1.805308000 | -2.657977000 |
| H | -3.425121000 | -4.113085000 | 1.498072000  |
| H | -1.076777000 | -0.111147000 | -1.680963000 |
| H | 2.522185000  | -2.420298000 | -0.051307000 |
| O | -2.519536000 | 0.614879000  | 0.572497000  |
| H | -1.720939000 | 4.526158000  | -0.036973000 |

R<sub>2,2</sub>

|   |              |              |              |
|---|--------------|--------------|--------------|
| C | -2.349358000 | 1.517568000  | -0.335909000 |
| C | -3.523010000 | 0.592302000  | -0.118920000 |
| O | -4.700004000 | 1.129938000  | -0.647322000 |
| C | -3.278757000 | -0.816613000 | -0.634865000 |
| O | -4.216803000 | -1.536539000 | -0.961598000 |
| C | -1.904059000 | -1.244080000 | -0.605205000 |
| C | -0.891180000 | -0.370489000 | -0.386784000 |
| H | -4.669820000 | 2.090872000  | -0.526923000 |
| H | -1.679817000 | -2.288507000 | -0.778922000 |
| O | -1.103278000 | 0.982093000  | -0.241219000 |
| O | -2.471456000 | 2.700060000  | -0.509185000 |
| C | 0.500633000  | -0.742795000 | -0.320042000 |
| H | 0.690135000  | -1.804285000 | -0.432931000 |
| C | 1.499161000  | 0.141114000  | -0.129063000 |
| H | 1.232220000  | 1.189330000  | -0.025682000 |
| C | 2.924542000  | -0.152972000 | -0.044128000 |
| C | 3.809961000  | 0.920198000  | 0.152688000  |
| C | 3.454460000  | -1.446254000 | -0.148617000 |
| C | 5.171911000  | 0.703176000  | 0.240953000  |
| H | 3.422538000  | 1.932112000  | 0.235818000  |
| C | 4.821311000  | -1.663468000 | -0.059781000 |
| H | 2.800901000  | -2.297339000 | -0.300481000 |
| C | 5.687428000  | -0.593892000 | 0.134967000  |
| H | 5.236434000  | -2.661999000 | -0.139717000 |
| O | 7.022128000  | -0.810734000 | 0.221214000  |
| H | 7.473916000  | 0.036442000  | 0.354915000  |
| O | 6.108746000  | 1.682093000  | 0.431487000  |
| H | 5.702887000  | 2.555799000  | 0.493048000  |
| H | -3.605910000 | 0.464295000  | 0.979650000  |
| O | -5.057972000 | -0.273009000 | 2.476581000  |

|   |              |              |              |
|---|--------------|--------------|--------------|
| H | -5.135149000 | -0.845935000 | 3.247392000  |
| H | -5.709910000 | -0.597871000 | 1.817315000  |
| O | -6.630817000 | -1.048030000 | 0.336997000  |
| H | -5.872885000 | -1.211804000 | -0.262075000 |
| H | -7.028157000 | -0.230865000 | 0.011189000  |

TS<sub>2.2</sub>

|   |              |              |              |
|---|--------------|--------------|--------------|
| C | -2.457304000 | 1.463900000  | -0.365061000 |
| C | -3.560096000 | 0.540610000  | -0.303732000 |
| O | -4.799837000 | 1.085400000  | -0.660851000 |
| C | -3.341004000 | -0.849319000 | -0.633052000 |
| O | -4.280367000 | -1.650867000 | -0.841462000 |
| C | -1.959250000 | -1.280143000 | -0.573020000 |
| C | -0.953854000 | -0.394043000 | -0.386755000 |
| H | -4.678355000 | 2.047778000  | -0.692407000 |
| H | -1.737598000 | -2.331639000 | -0.703443000 |
| O | -1.190046000 | 0.943985000  | -0.251353000 |
| O | -2.576732000 | 2.673787000  | -0.448944000 |
| C | 0.448605000  | -0.755269000 | -0.309227000 |
| H | 0.646452000  | -1.816948000 | -0.411493000 |
| C | 1.439749000  | 0.134254000  | -0.130405000 |
| H | 1.166576000  | 1.182487000  | -0.042691000 |
| C | 2.871442000  | -0.151162000 | -0.043198000 |
| C | 3.753896000  | 0.931033000  | 0.102162000  |
| C | 3.407767000  | -1.444110000 | -0.096374000 |
| C | 5.118601000  | 0.724013000  | 0.188969000  |
| H | 3.363608000  | 1.944423000  | 0.145031000  |
| C | 4.777346000  | -1.651559000 | -0.008619000 |
| H | 2.756875000  | -2.304042000 | -0.204718000 |
| C | 5.640500000  | -0.572232000 | 0.133780000  |
| H | 5.195575000  | -2.651361000 | -0.048508000 |
| O | 6.979560000  | -0.779511000 | 0.219671000  |
| H | 7.426276000  | 0.075423000  | 0.312925000  |
| O | 6.049760000  | 1.718028000  | 0.331109000  |
| H | 5.634984000  | 2.589102000  | 0.363509000  |
| H | -3.859560000 | 0.316486000  | 1.134093000  |
| O | -4.536397000 | 0.121431000  | 2.061857000  |
| H | -4.079504000 | -0.404349000 | 2.735691000  |
| H | -5.344576000 | -0.418413000 | 1.654614000  |
| O | -6.264932000 | -1.164448000 | 0.813802000  |
| H | -5.672803000 | -1.374199000 | 0.034855000  |
| H | -6.984407000 | -0.613018000 | 0.479098000  |

P<sub>2.2</sub>



|   |              |              |              |
|---|--------------|--------------|--------------|
| C | -2.271247000 | 1.405699000  | -0.291089000 |
| C | -3.354964000 | 0.477794000  | -0.260644000 |
| O | -4.609636000 | 1.032706000  | -0.327535000 |
| C | -3.132288000 | -0.871661000 | -0.195993000 |
| O | -4.063417000 | -1.818145000 | -0.193469000 |
| C | -1.774302000 | -1.318189000 | -0.118767000 |
| C | -0.753353000 | -0.429229000 | -0.130672000 |
| H | -4.471195000 | 1.977410000  | -0.524910000 |
| H | -1.576726000 | -2.380048000 | -0.054470000 |
| O | -1.004715000 | 0.906550000  | -0.219373000 |
| O | -2.430715000 | 2.617827000  | -0.389447000 |
| C | 0.652361000  | -0.776256000 | -0.056326000 |
| H | 0.847867000  | -1.841228000 | 0.014779000  |
| C | 1.648928000  | 0.124056000  | -0.071053000 |
| H | 1.379277000  | 1.174618000  | -0.141485000 |
| C | 3.084629000  | -0.150831000 | 0.001084000  |
| C | 3.967326000  | 0.940510000  | 0.000483000  |
| C | 3.625247000  | -1.441056000 | 0.071321000  |
| C | 5.335052000  | 0.745849000  | 0.071479000  |
| H | 3.575137000  | 1.952437000  | -0.056099000 |
| C | 4.998013000  | -1.636232000 | 0.141014000  |
| H | 2.975853000  | -2.308952000 | 0.070514000  |
| C | 5.860849000  | -0.547542000 | 0.142501000  |
| H | 5.418798000  | -2.634345000 | 0.195169000  |
| O | 7.203570000  | -0.743400000 | 0.212072000  |
| H | 7.648543000  | 0.117351000  | 0.204565000  |
| O | 6.264663000  | 1.752048000  | 0.077772000  |
| H | 5.844988000  | 2.620883000  | 0.046124000  |
| H | -5.963194000 | 0.989995000  | 0.983417000  |
| O | -6.848385000 | 0.741341000  | 1.308458000  |
| H | -6.814032000 | 0.734214000  | 2.272313000  |
| H | -6.921693000 | -0.726085000 | 0.369035000  |
| O | -6.652713000 | -1.478682000 | -0.206002000 |
| H | -5.017360000 | -1.521324000 | -0.251469000 |
| H | -7.112974000 | -1.374358000 | -1.047314000 |

R<sub>3,1</sub>

|   |              |              |              |
|---|--------------|--------------|--------------|
| C | -4.185148000 | -2.038605000 | 0.038946000  |
| C | -3.612160000 | -0.637354000 | -0.212301000 |
| O | -3.346080000 | -3.020646000 | 0.251671000  |
| O | -5.388077000 | -2.193732000 | 0.033627000  |
| O | -4.597482000 | 0.216159000  | -0.420358000 |
| C | -1.081786000 | -0.975109000 | -0.038662000 |
| C | 0.157518000  | -0.198473000 | -0.126622000 |

|   |              |              |              |
|---|--------------|--------------|--------------|
| H | 0.063668000  | 0.862845000  | -0.327424000 |
| C | 1.354541000  | -0.790815000 | 0.038624000  |
| H | 1.341051000  | -1.860479000 | 0.237259000  |
| C | 2.672131000  | -0.170393000 | -0.014017000 |
| C | 3.796553000  | -0.985643000 | 0.197628000  |
| C | 2.872655000  | 1.194285000  | -0.262638000 |
| C | 5.070931000  | -0.452082000 | 0.164954000  |
| H | 3.664485000  | -2.047253000 | 0.387764000  |
| C | 4.151635000  | 1.729321000  | -0.297743000 |
| H | 2.026438000  | 1.850123000  | -0.431634000 |
| C | 5.256382000  | 0.912834000  | -0.083918000 |
| H | 4.313587000  | 2.784169000  | -0.489907000 |
| O | 6.504005000  | 1.440611000  | -0.117281000 |
| H | 7.150610000  | 0.738483000  | 0.051967000  |
| O | 6.222876000  | -1.164762000 | 0.360903000  |
| H | 6.040084000  | -2.094872000 | 0.544409000  |
| C | -2.308505000 | -0.228612000 | -0.234994000 |
| H | -2.167220000 | 0.829307000  | -0.432083000 |
| H | -4.277098000 | 1.150752000  | -0.581042000 |
| O | -1.034561000 | -2.206893000 | 0.193734000  |
| H | -2.349062000 | -2.733989000 | 0.234983000  |
| O | -3.817862000 | 2.690252000  | -0.800559000 |
| H | -3.985165000 | 3.061553000  | -1.675655000 |
| H | -4.283245000 | 4.718122000  | 1.745063000  |
| O | -4.859915000 | 4.383777000  | 1.046505000  |
| H | -4.191497000 | 3.321360000  | -0.142542000 |
| H | -5.678370000 | 4.105624000  | 1.477355000  |

TS<sub>3.1</sub>

|   |              |              |              |
|---|--------------|--------------|--------------|
| C | -4.411939000 | -1.518023000 | -0.262172000 |
| C | -3.773602000 | -0.118972000 | -0.553815000 |
| O | -3.665939000 | -2.446695000 | 0.280135000  |
| O | -5.582497000 | -1.684558000 | -0.527698000 |
| O | -4.576851000 | 0.727651000  | -0.962162000 |
| C | -1.247187000 | -0.573911000 | -0.015200000 |
| C | 0.068764000  | 0.059157000  | -0.179118000 |
| H | 0.082534000  | 1.086381000  | -0.526940000 |
| C | 1.198614000  | -0.620585000 | 0.081125000  |
| H | 1.078008000  | -1.647678000 | 0.419133000  |
| C | 2.573503000  | -0.146529000 | -0.039865000 |
| C | 3.612579000  | -1.038084000 | 0.273719000  |
| C | 2.907206000  | 1.149831000  | -0.453544000 |
| C | 4.933989000  | -0.644390000 | 0.172338000  |
| H | 3.377094000  | -2.048394000 | 0.598013000  |

|   |              |              |              |
|---|--------------|--------------|--------------|
| C | 4.233007000  | 1.545552000  | -0.552636000 |
| H | 2.129223000  | 1.861993000  | -0.702984000 |
| C | 5.252725000  | 0.653734000  | -0.241811000 |
| H | 4.496752000  | 2.547391000  | -0.873110000 |
| O | 6.547415000  | 1.043802000  | -0.341841000 |
| H | 7.121902000  | 0.302202000  | -0.097794000 |
| O | 6.011529000  | -1.440455000 | 0.453998000  |
| H | 5.740363000  | -2.334276000 | 0.697534000  |
| C | -2.394088000 | 0.257353000  | -0.311140000 |
| H | -2.141485000 | 1.148893000  | -0.885919000 |
| H | -4.524601000 | 2.379276000  | -0.471018000 |
| O | -1.319836000 | -1.753732000 | 0.410812000  |
| H | -2.660188000 | -2.186607000 | 0.375069000  |
| O | -4.316475000 | 3.147794000  | 0.118938000  |
| H | -5.137276000 | 3.617148000  | 0.313845000  |
| H | -2.591036000 | 1.089148000  | 0.945579000  |
| O | -2.840244000 | 1.914226000  | 1.694375000  |
| H | -3.511282000 | 2.530424000  | 1.184185000  |
| H | -3.238238000 | 1.559050000  | 2.504668000  |

P<sub>3,1</sub>

|   |              |              |              |
|---|--------------|--------------|--------------|
| C | -4.257710000 | -1.404069000 | 0.012115000  |
| C | -3.466932000 | -0.150740000 | -0.422997000 |
| O | -3.558769000 | -2.503937000 | 0.179392000  |
| O | -5.456090000 | -1.337411000 | 0.174831000  |
| O | -3.850239000 | 0.458496000  | -1.397642000 |
| C | -1.017085000 | -0.551577000 | 0.107559000  |
| C | 0.264274000  | 0.124543000  | 0.173694000  |
| H | 0.255367000  | 1.190745000  | 0.367350000  |
| C | 1.410718000  | -0.570669000 | 0.004482000  |
| H | 1.303882000  | -1.637360000 | -0.182672000 |
| C | 2.770630000  | -0.066937000 | 0.041236000  |
| C | 3.822053000  | -0.981137000 | -0.153429000 |
| C | 3.083380000  | 1.282913000  | 0.259759000  |
| C | 5.135106000  | -0.555530000 | -0.128067000 |
| H | 3.600095000  | -2.030885000 | -0.325664000 |
| C | 4.401018000  | 1.709760000  | 0.282826000  |
| H | 2.294664000  | 2.010205000  | 0.412274000  |
| C | 5.432659000  | 0.796708000  | 0.089618000  |
| H | 4.651813000  | 2.751202000  | 0.449898000  |
| O | 6.716675000  | 1.217589000  | 0.112504000  |
| H | 7.304709000  | 0.461024000  | -0.036967000 |
| O | 6.226097000  | -1.360328000 | -0.304560000 |
| H | 5.974263000  | -2.282547000 | -0.438867000 |

|   |              |              |              |
|---|--------------|--------------|--------------|
| C | -2.258860000 | 0.284505000  | 0.378106000  |
| H | -2.072437000 | 1.336131000  | 0.157166000  |
| H | -4.567599000 | 2.359153000  | -1.339649000 |
| O | -1.125850000 | -1.763855000 | -0.130475000 |
| H | -2.572134000 | -2.334521000 | 0.029475000  |
| O | -4.939198000 | 3.035040000  | -0.751619000 |
| H | -5.681512000 | 3.433397000  | -1.221524000 |
| H | -2.490052000 | 0.203830000  | 1.447774000  |
| O | -5.141400000 | 1.310446000  | 1.475761000  |
| H | -5.199532000 | 2.005921000  | 0.793688000  |
| H | -5.686837000 | 0.578766000  | 1.152770000  |

R<sub>3,2</sub>

|   |              |              |              |
|---|--------------|--------------|--------------|
| C | -3.804401000 | -1.752779000 | -0.344522000 |
| C | -2.667412000 | -2.591137000 | 0.309445000  |
| O | -3.488129000 | -0.952788000 | -1.344776000 |
| O | -4.941486000 | -1.890263000 | 0.041410000  |
| O | -2.922865000 | -3.201792000 | 1.318245000  |
| C | -0.495262000 | -1.579097000 | -0.738634000 |
| C | 0.885547000  | -1.557540000 | -0.281970000 |
| H | 1.221695000  | -2.385129000 | 0.331429000  |
| C | 1.693084000  | -0.528755000 | -0.611772000 |
| H | 1.249878000  | 0.253956000  | -1.224181000 |
| C | 3.085945000  | -0.334235000 | -0.244565000 |
| C | 3.735030000  | 0.826029000  | -0.701395000 |
| C | 3.808725000  | -1.243056000 | 0.541202000  |
| C | 5.056144000  | 1.066188000  | -0.378297000 |
| H | 3.192884000  | 1.541243000  | -1.313735000 |
| C | 5.135716000  | -1.003754000 | 0.861983000  |
| H | 3.335108000  | -2.145433000 | 0.909758000  |
| C | 5.766517000  | 0.148933000  | 0.406344000  |
| H | 5.701198000  | -1.701017000 | 1.469967000  |
| O | 7.061776000  | 0.379574000  | 0.723598000  |
| H | 7.339493000  | 1.223630000  | 0.335647000  |
| O | 5.772885000  | 2.163280000  | -0.771653000 |
| H | 5.229859000  | 2.783231000  | -1.274446000 |
| C | -1.330621000 | -2.798883000 | -0.392921000 |
| H | -0.766253000 | -3.491378000 | 0.230280000  |
| O | -0.974346000 | -0.681715000 | -1.444364000 |
| H | -2.487013000 | -0.827131000 | -1.463723000 |
| H | -1.544932000 | -3.304206000 | -1.345344000 |
| H | -2.362472000 | -0.512701000 | 2.286905000  |
| O | -1.970563000 | -0.308074000 | 1.429551000  |
| C | -2.898376000 | 3.442671000  | 1.112504000  |

|   |              |             |              |
|---|--------------|-------------|--------------|
| C | -3.771865000 | 4.244948000 | 0.434245000  |
| N | -4.426936000 | 3.411239000 | -0.441640000 |
| C | -3.939357000 | 2.161125000 | -0.267439000 |
| N | -3.011081000 | 2.145335000 | 0.665992000  |
| H | -3.982019000 | 5.300825000 | 0.493374000  |
| H | -4.275509000 | 1.302799000 | -0.831869000 |
| H | -2.200452000 | 3.716669000 | 1.889599000  |
| H | -5.147559000 | 3.678019000 | -1.096239000 |
| H | -2.292455000 | 0.600895000 | 1.190775000  |

TS1<sub>3,2</sub>

|   |              |              |              |
|---|--------------|--------------|--------------|
| C | 3.750276000  | -2.088959000 | 0.890323000  |
| C | 2.981380000  | -2.183830000 | -0.441796000 |
| O | 3.240773000  | -1.233694000 | 1.702223000  |
| O | 4.751630000  | -2.774118000 | 1.053420000  |
| O | 3.560028000  | -2.086889000 | -1.505766000 |
| C | 0.759158000  | -0.972471000 | -0.107873000 |
| C | -0.659193000 | -0.897674000 | -0.508325000 |
| H | -0.902293000 | -1.333331000 | -1.470653000 |
| C | -1.579867000 | -0.342629000 | 0.288177000  |
| H | -1.236149000 | 0.054571000  | 1.240150000  |
| C | -3.015114000 | -0.211991000 | 0.025512000  |
| C | -3.824557000 | 0.335255000  | 1.032285000  |
| C | -3.617316000 | -0.598777000 | -1.177539000 |
| C | -5.186383000 | 0.485116000  | 0.840919000  |
| H | -3.379863000 | 0.644603000  | 1.974211000  |
| C | -4.984174000 | -0.449981000 | -1.369248000 |
| H | -3.020099000 | -1.017039000 | -1.979673000 |
| C | -5.776179000 | 0.091013000  | -0.364169000 |
| H | -5.454579000 | -0.747180000 | -2.300113000 |
| O | -7.112334000 | 0.236696000  | -0.556614000 |
| H | -7.505282000 | 0.628362000  | 0.237925000  |
| O | -6.050466000 | 1.008445000  | 1.765669000  |
| H | -5.589447000 | 1.273354000  | 2.571422000  |
| C | 1.465691000  | -2.296061000 | -0.398135000 |
| H | 1.127709000  | -2.692515000 | -1.356854000 |
| O | 1.095580000  | -0.347047000 | 0.975949000  |
| H | 2.052619000  | -0.710599000 | 1.346504000  |
| H | 1.155315000  | -2.985948000 | 0.394469000  |
| H | 2.055716000  | -0.473615000 | -2.052961000 |
| O | 1.466435000  | 0.039123000  | -1.474936000 |
| C | 2.983907000  | 3.234775000  | -1.091245000 |
| C | 3.883514000  | 3.942186000  | -0.349466000 |
| N | 4.318141000  | 3.076431000  | 0.627411000  |

|   |             |             |              |
|---|-------------|-------------|--------------|
| C | 3.688230000 | 1.897773000 | 0.458668000  |
| N | 2.871445000 | 1.962893000 | -0.575758000 |
| H | 4.244058000 | 4.955082000 | -0.425467000 |
| H | 3.842186000 | 1.032975000 | 1.089702000  |
| H | 2.414247000 | 3.551688000 | -1.951292000 |
| H | 4.994933000 | 3.280368000 | 1.348982000  |
| H | 2.044404000 | 0.861363000 | -1.075998000 |

IM<sub>3,2</sub>

|   |              |              |              |
|---|--------------|--------------|--------------|
| C | 3.520029000  | -2.232578000 | 0.917340000  |
| C | 2.728119000  | -2.261706000 | -0.395331000 |
| O | 3.258593000  | -1.179174000 | 1.588509000  |
| O | 4.309965000  | -3.140156000 | 1.175489000  |
| O | 3.299321000  | -2.199971000 | -1.475023000 |
| C | 0.746231000  | -0.689563000 | -0.395086000 |
| C | -0.727594000 | -0.614452000 | -0.690924000 |
| H | -0.997413000 | -0.955562000 | -1.686607000 |
| C | -1.636776000 | -0.175552000 | 0.179960000  |
| H | -1.276970000 | 0.143276000  | 1.154766000  |
| C | -3.088734000 | -0.066494000 | -0.033386000 |
| C | -3.882111000 | 0.393441000  | 1.026818000  |
| C | -3.720920000 | -0.392857000 | -1.238474000 |
| C | -5.253836000 | 0.520129000  | 0.884598000  |
| H | -3.418173000 | 0.653830000  | 1.974804000  |
| C | -5.097406000 | -0.268221000 | -1.380921000 |
| H | -3.139667000 | -0.747763000 | -2.081963000 |
| C | -5.872115000 | 0.188334000  | -0.322956000 |
| H | -5.587763000 | -0.521372000 | -2.314776000 |
| O | -7.220367000 | 0.311324000  | -0.466694000 |
| H | -7.595827000 | 0.637709000  | 0.364509000  |
| O | -6.098600000 | 0.963641000  | 1.869418000  |
| H | -5.614248000 | 1.181772000  | 2.675275000  |
| C | 1.217969000  | -2.169587000 | -0.339013000 |
| H | 0.818775000  | -2.703826000 | -1.204602000 |
| O | 1.041288000  | -0.017337000 | 0.776645000  |
| H | 1.861186000  | -0.417427000 | 1.182003000  |
| H | 0.814638000  | -2.612791000 | 0.573309000  |
| H | 1.999951000  | -0.651071000 | -1.966664000 |
| O | 1.432402000  | -0.021973000 | -1.489058000 |
| C | 3.493609000  | 3.163926000  | -0.982176000 |
| C | 4.530903000  | 3.626951000  | -0.237611000 |
| N | 4.829894000  | 2.631561000  | 0.669332000  |
| C | 4.007018000  | 1.598308000  | 0.489158000  |
| N | 3.189985000  | 1.906954000  | -0.509457000 |

|   |            |            |             |
|---|------------|------------|-------------|
| H | 5.07136000 | 4.55820400 | -0.27106900 |
| H | 3.99416200 | 0.66491300 | 1.04550300  |
| H | 2.95192500 | 3.61790500 | -1.79539900 |
| H | 5.56016600 | 2.66501700 | 1.36880900  |
| H | 2.45161500 | 1.26627800 | -0.86329300 |

TS<sub>23.2</sub>

|   |             |             |             |
|---|-------------|-------------|-------------|
| C | -3.08847400 | 2.82463600  | 0.84025000  |
| C | -2.51229600 | 2.51154600  | -0.53532500 |
| O | -2.74710700 | 1.97151500  | 1.79662400  |
| O | -3.81721600 | 3.77274800  | 1.04341900  |
| O | -3.31991600 | 2.04972300  | -1.39966800 |
| C | -0.96410600 | 0.38767500  | -0.43871500 |
| C | 0.47218300  | 0.31333500  | -0.79230500 |
| H | 0.70298400  | 0.46099400  | -1.84138100 |
| C | 1.41035400  | 0.07201700  | 0.13055100  |
| H | 1.06952200  | -0.05686700 | 1.15556300  |
| C | 2.85711800  | -0.03930800 | -0.08426200 |
| C | 3.67772500  | -0.29356100 | 1.02478000  |
| C | 3.46334800  | 0.09446000  | -1.33949800 |
| C | 5.04996800  | -0.40491100 | 0.88082200  |
| H | 3.23399600  | -0.40274900 | 2.01110300  |
| C | 4.83984300  | -0.01949300 | -1.48419100 |
| H | 2.86055500  | 0.29075400  | -2.21879700 |
| C | 5.64139800  | -0.26903300 | -0.37779500 |
| H | 5.31054200  | 0.08572800  | -2.45569400 |
| O | 6.98938600  | -0.37871200 | -0.52318100 |
| H | 7.38747600  | -0.53835800 | 0.34554100  |
| O | 5.92189600  | -0.65126400 | 1.90957400  |
| H | 5.46349700  | -0.68624700 | 2.75816400  |
| C | -1.12863400 | 2.52304000  | -0.69959100 |
| H | -0.74360500 | 2.56767300  | -1.71258200 |
| O | -1.37097800 | 0.10613200  | 0.73085000  |
| H | -2.18882900 | 1.20533400  | 1.42821100  |
| H | -0.49998400 | 2.93290600  | 0.08343700  |
| H | -2.50314800 | 0.73296700  | -1.63667800 |
| O | -1.77730800 | 0.02975700  | -1.50761000 |
| C | -3.89787700 | -3.09516100 | -1.07526100 |
| C | -4.41188400 | -3.87032400 | -0.08511300 |
| N | -3.96227100 | -3.32998800 | 1.10197400  |
| C | -3.20252400 | -2.26470800 | 0.84567600  |
| N | -3.15274500 | -2.10987300 | -0.46855000 |
| H | -5.04630100 | -4.74030700 | -0.11858300 |
| H | -2.70221800 | -1.62478700 | 1.55555600  |

|   |              |              |              |
|---|--------------|--------------|--------------|
| H | -4.000882000 | -3.160581000 | -2.145799000 |
| H | -4.173736000 | -3.675979000 | 2.028679000  |
| H | -2.631675000 | -1.331902000 | -0.930904000 |

P<sub>3,2</sub>

|   |              |              |              |
|---|--------------|--------------|--------------|
| C | -2.995447000 | 2.908279000  | 0.630100000  |
| C | -3.208157000 | 2.429728000  | -0.783404000 |
| O | -2.474053000 | 2.029807000  | 1.479260000  |
| O | -3.284804000 | 4.032027000  | 0.992958000  |
| O | -3.482584000 | 1.097901000  | -0.902124000 |
| C | -0.664075000 | -0.330315000 | -0.503313000 |
| C | 0.776732000  | -0.442445000 | -0.832143000 |
| H | 1.001422000  | -0.746272000 | -1.848821000 |
| C | 1.726992000  | -0.172081000 | 0.072711000  |
| H | 1.384381000  | 0.133057000  | 1.059367000  |
| C | 3.179009000  | -0.235569000 | -0.109875000 |
| C | 4.000874000  | 0.119091000  | 0.970607000  |
| C | 3.788078000  | -0.632974000 | -1.306504000 |
| C | 5.378978000  | 0.077542000  | 0.854576000  |
| H | 3.552260000  | 0.432377000  | 1.909746000  |
| C | 5.170861000  | -0.675083000 | -1.422870000 |
| H | 3.181690000  | -0.913810000 | -2.159911000 |
| C | 5.973927000  | -0.320979000 | -0.345954000 |
| H | 5.645893000  | -0.981902000 | -2.348351000 |
| O | 7.327127000  | -0.363733000 | -0.463322000 |
| H | 7.725025000  | -0.080905000 | 0.373710000  |
| O | 6.255163000  | 0.404896000  | 1.856100000  |
| H | 5.789742000  | 0.689433000  | 2.652416000  |
| C | -3.160168000 | 3.284412000  | -1.802215000 |
| H | -3.309109000 | 2.943091000  | -2.820281000 |
| O | -1.034456000 | -0.019800000 | 0.659219000  |
| H | -2.087123000 | 1.216546000  | 1.047389000  |
| H | -2.965998000 | 4.333803000  | -1.620653000 |
| H | -2.725346000 | 0.569089000  | -1.265258000 |
| O | -1.492698000 | -0.574743000 | -1.455556000 |
| C | -4.230025000 | -3.024962000 | -0.686987000 |
| C | -4.953553000 | -3.434633000 | 0.388033000  |
| N | -4.488176000 | -2.709408000 | 1.464978000  |
| C | -3.518502000 | -1.888152000 | 1.058683000  |
| N | -3.348193000 | -2.067660000 | -0.241354000 |
| H | -5.743195000 | -4.161549000 | 0.480736000  |
| H | -2.956678000 | -1.194112000 | 1.663836000  |
| H | -4.271604000 | -3.330168000 | -1.719533000 |
| H | -4.825865000 | -2.775913000 | 2.415951000  |



H    -2.643598000    -1.515276000    -0.806674000
